# Supplementary material for: Red-emitting fluorogenic BODIPY-tetrazine probes for biological imaging
Source: Royal Society of Chemistry journal article supplement (doi:10.1039/d1cc05863k), 2021-11-25
Supplement: d1cc05863k1.pdf [file d1cc05863k1.pdf]

## Supporting Information

# Red-Emitting Fluorogenic BODIPY-Tetrazine Probes for Biological Imaging

Lei Chen,<sup>a</sup> Fei Li,<sup>b</sup> Yan Li,<sup>a</sup> Jun Yang,<sup>\*b</sup> Yongjun Li<sup>\*a</sup> and Bin He<sup>\*a</sup>

<sup>a</sup>State Key Laboratory of Functions and Applications of Medicinal Plants, Engineering Research Center for the Development and Application of Ethnic Medicine and TCM (Ministry of Education), Guizhou Provincial Key Laboratory of Pharmaceuticals, School of Pharmacy, Guizhou Medical University, Guiyang 550004, China. E-mail:

<sup>b</sup>Key laboratory of Macromolecular Science of Shaanxi Province, Key laboratory of Applied Surface and Colloid Chemistry, Ministry of Education, School of Chemistry and Chemical Engineering, Shaanxi Normal University, Chang'an Campus: No. 620, West Chang'an Avenue, Chang'an District, Xi'an, 710119, China. E-mail: junyang@snnu.edu.cn

## Table of Contents

|                                                                                                                                                        |    |
|--------------------------------------------------------------------------------------------------------------------------------------------------------|----|
| General Procedures .....                                                                                                                               | 2  |
| Synthesis and characterization.....                                                                                                                    | 2  |
| Measurement of fluorescence quantum yields.....                                                                                                        | 13 |
| The stability of compound <b>6i</b> .....                                                                                                              | 15 |
| The biorthogonal reaction kinetic measurements.....                                                                                                    | 15 |
| HPLC characterization of the bioorthogonal reaction between compound <b>6i</b> with <i>trans</i> -cyclooctenol <b>7</b> or cyclopropene <b>8</b> ..... | 17 |
| Experimental procedures for fluorescence imaging .....                                                                                                 | 19 |
| NMR spectra .....                                                                                                                                      | 20 |
| References .....                                                                                                                                       | 41 |

## General Procedures

All reactions were performed using flame-dried round-bottomed flasks or reaction vessels unless otherwise stated. Where appropriate, reactions were carried out under an inert atmosphere of nitrogen with dry solvents, unless otherwise stated. Yields refer to chromatographically, unless otherwise stated. Reagents were purchased at the highest commercial quality and used without further purification, unless otherwise stated. Reactions were monitored by thin-layer chromatography carried out on 0.20-0.25 mm Qingdao Marine Chemical Plant silica gel plates (GF254) using ultraviolet light as visualizing agent and an acidic mixture of *p*-anisaldehyde or a basic mixture of potassium permanganate and heat as developing agents. NMR spectra were recorded on a Bruker 600 MHz, Bruker 400 MHz or JEOL 400 MHz spectrometer. High resolution mass spectra (HRMS) dates were recorded on Bruker Apex IV FTMS with ESI source and Bruker Maxis with EI source. Emission spectra were recorded on a Perkin Elmer LS-55 spectrometer.

## Synthesis and characterization

### Synthesis of compound 2

The synthesis of compound **2** was accomplished according to the reported procedure <sup>[1]</sup>.

### Synthesis of compound 3

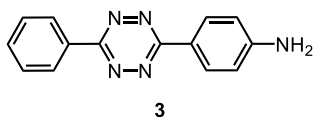

In a 100 mL round-bottomed flask, 4-Aminobenzonitrile (1.0 g, 8.5 mmol) was dissolved in ethanol (15 mL), followed by addition of benzonitrile (2.6 mL, 25.4 mmol) and  $S_8$  (1.4 g, 42.3 mmol), then hydrazine hydrate (8.5 g, 169.2 mmol) was added in drops into the solution. The resulting solution was refluxed at 80 °C and stirred for 12 h. (**Caution! This step generates a large amount of toxic nitrogenoxide gasses and should be performed in a well ventilated fume hood**). After completion, the mixture was cooled. The solvent was concentrated *in vacuo*. The crude residue was purified via flash chromatography on silica gel (PE: EA = 3: 1) to give intermediates product as a pale brown solid. Then the solid was re-dissolved in acetone and exposed in air stir for 72 h. TLC analysis showed consumption of starting material. The solvent was concentrated *in vacuo*. The crude residue was purified via flash chromatography on silica gel (PE: EA = 15: 1) to give **3** (220.0 mg, 10.5%) as a red solid.

**<sup>1</sup>H NMR** (600 MHz,  $CDCl_3$ )  $\delta$  8.59-8.61 (m, 2H), 8.46-8.48 (d,  $J$  = 8.5 Hz, 2H), 7.59-7.60 (d,  $J$  = 6.5 Hz, 3H), 6.82-6.84 (d,  $J$  = 8.5 Hz, 2H), 4.17 (s, 2H).

**<sup>13</sup>C NMR** (151 MHz,  $CDCl_3$ )  $\delta$  163.7, 163.2, 150.8, 132.2, 132.1, 129.9, 129.2, 127.5, 121.4, 115.0.

**HRMS** (ESI)  $m/z$ : Calculated for  $C_{14}H_{12}N_5$  [ $M+H$ ]<sup>+</sup> 250.1087, found 250.1088.

### Synthesis of compound 4

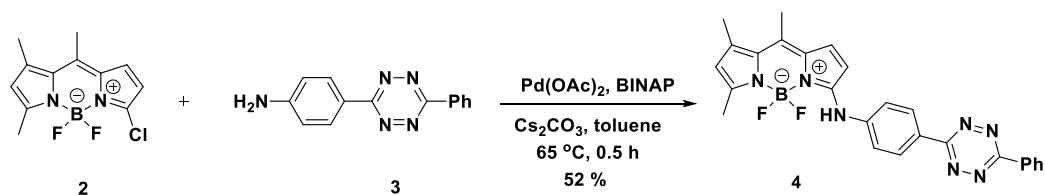

Under a  $N_2$  atmosphere, **2** (11 mg, 0.04 mmol) and palladium acetate (0.5 mg, 0.002 mmol) was added. Then BINAP (2 mg, 0.003 mmol) was added, followed by cesium carbonate (18 mg, 0.056 mmol) and **3** (12 mg, 0.048 mmol) was added. The reaction was dissolved in anhydrous toluene (2 mL). The solution was stirred at 65 °C for 30 minutes. After which consumption of starting material was confirmed by TLC, the solution was concentrated *in vacuo*. The crude product was purified with thin layer chromatography on silica gel (PE: DCM = 1: 1.5) to give **4** (16 mg, 52%) as an orange solid.

$^1H$  NMR (600 MHz,  $CDCl_3$ )  $\delta$  8.64-8.67 (m, 4H), 7.94 (s, 1H), 7.62-7.63 (m, 3H), 7.41-7.42 (d,  $J$  = 8.8 Hz, 2H), 7.27-7.28 (d,  $J$  = 4.7 Hz, 1H), 6.52-6.53 (d,  $J$  = 4.6 Hz, 1H), 6.04 (s, 1H), 2.53 (s, 3H), 2.51 (s, 3H), 2.41 (s, 3H).

$^{13}C$  NMR (151 MHz,  $CDCl_3$ )  $\delta$  163.7, 163.4, 152.8, 150.2, 143.2, 138.1, 135.3, 132.5, 131.9, 131.0, 129.6, 129.4, 129.3, 128.8, 128.3, 127.9, 126.5, 119.6, 106.0, 29.7, 16.2, 16.1.

HRMS (ESI)  $m/z$ : Calculated for  $C_{26}H_{22}BF_2N_7Na$  [ $M+Na$ ] $^+$  504.1895, found 504.1894.

### Synthesis of compound 5

The synthesis of compound **5** was accomplished according to the reported procedure<sup>[2]</sup>.

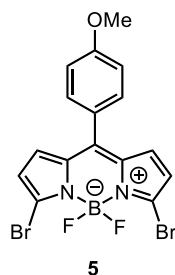

1) In a 2.0 L round-bottomed flask, *p*-methoxybenzaldehyde (13.4 mL, 110 mmol) and pyrrole (23.4 mL, 330 mmol) were dissolved dilute hydrochloric acid (750 mL, 180 mmol), then the reaction mixture was stirred at room temperature for 12 h. TLC analysis showed consumption of starting material. The reaction was dissolved in ethyl acetate. The crude residue was purified via flash chromatography on silica gel (PE: EA = 10: 1) to give desired product (20 g, 72%) as a light blue-green solid.

2) Under nitrogen atmosphere, *N*-bromosuccinimide (593 mg, 3.33 mmol) was added to a cooled (-78 °C) solution of the light blue-green solid (402 mg, 1.58 mmol) in anhydrous THF (30 mL), then the DDQ (396.7 mg, 1.75 mmol) was added. The reaction was stirred at room temperature for 30 minutes, after which TLC indicated consumption of starting material, the reaction was quenched with saturated ammonium chloride and extracted with ethyl acetate (50 mL  $\times$  3). The crude organic extracts were combined, dried over sodium sulfate, filtered, and concentrated *in vacuo*. The residue was then purified with flash chromatography on silica gel (PE: EA = 20: 1) to give desired product (500 mg, 82%) as an orange solid.

3) Under nitrogen atmosphere, the previous step product (292 mg, 0.72 mmol) was dissolved in

anhydrous toluene, followed by addition of triethylamine (0.11 mL, 0.72 mmol) and  $\text{BF}_3 \cdot \text{Et}_2\text{O}$  (0.27 mL, 2.15 mmol). The reaction was heated to 100 °C and stirred for 1 h. Then the reaction was quenched with 0.1 M sodium hydroxide and extracted with dichloromethane (30 mL  $\times$  3). The crude organic extracts were combined, then washed with sat. NaCl (50 mL  $\times$  3) dried over sodium sulfate, filtered, and concentrated *in vacuo*. The residue was then purified with flash chromatography on silica gel (PE: DCM = 3: 1) to give **5** (260 mg, 79%) as a red solid.

$^1\text{H NMR}$  (600 MHz,  $\text{CDCl}_3$ )  $\delta$  7.45-7.46 (d,  $J$  = 8.6 Hz, 2H), 7.03-7.04 (d,  $J$  = 8.6 Hz, 2H), 6.83 (d,  $J$  = 4.1 Hz, 2H), 6.54 (d,  $J$  = 4.1 Hz, 2H), 3.90 (s, 3H).

$^{13}\text{C NMR}$  (151 MHz,  $\text{CDCl}_3$ )  $\delta$  162.15, 143.34, 135.47, 132.26, 131.89, 131.50, 124.87, 122.48, 114.20, 55.55.

### Synthesis of compound **5b**

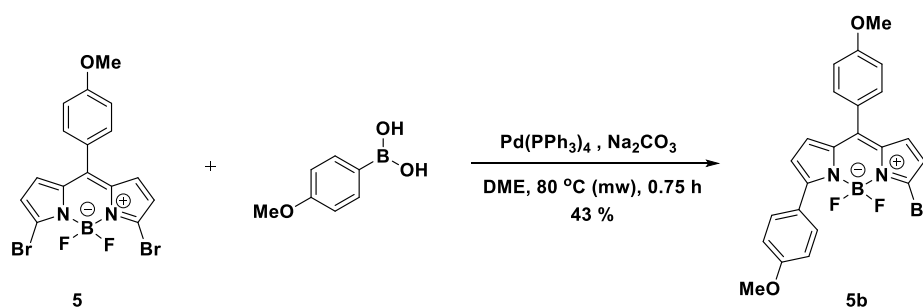

Under nitrogen atmosphere, **5** (19.4 mg, 0.043 mmol), 4-Methoxyphenylboronic acid (6.6 mg, 0.043 mmol), sodium carbonate (13.5 mg, 0.128 mmol) and  $\text{Pd}(\text{PPh}_3)_4$  (1.6 mg, 0.001 mmol) was dissolved in ethylene glycol dimethyl ether. Then the reaction was heated to 80 °C for 45 minutes via microwave. The reaction solution was concentrated *in vacuo*. The crude product was purified with thin layer chromatography on silica gel (PE: EA = 3: 1) to give **5b** (8.9 mg, 43%) as a purple-red solid.

$^1\text{H NMR}$  (400 MHz,  $\text{CDCl}_3$ )  $\delta$  7.96-7.98 (m, 2H), 7.47-7.50 (m, 2H), 7.00 -7.03 (m, 4H), 6.96-6.97 (d,  $J$  = 4.5 Hz, 1H), 6.70-6.73 (dd,  $J$  = 8.0, 4.3 Hz, 2H), 6.47-6.48 (d,  $J$  = 4.1 Hz, 1H), 3.91 (s, 3H), 3.88 (s, 3H).

$^{13}\text{C NMR}$  (101 MHz,  $\text{CDCl}_3$ )  $\delta$  161.6, 161.3, 160.9, 142.5, 137.2, 134.7, 132.8, 132.2, 131.3, 128.6, 127.2, 125.9, 124.4, 121.6, 120.9, 114.0, 113.9, 55.5, 55.3.

**HRMS:** (ESI)  $m/z$ : Calculated for  $\text{C}_{23}\text{H}_{18}\text{BBrF}_2\text{N}_2\text{NaO}_2$  [ $\text{M}+\text{Na}$ ] $^+$  505.0509, found 505.0555.

### Synthesis of compound **5c**

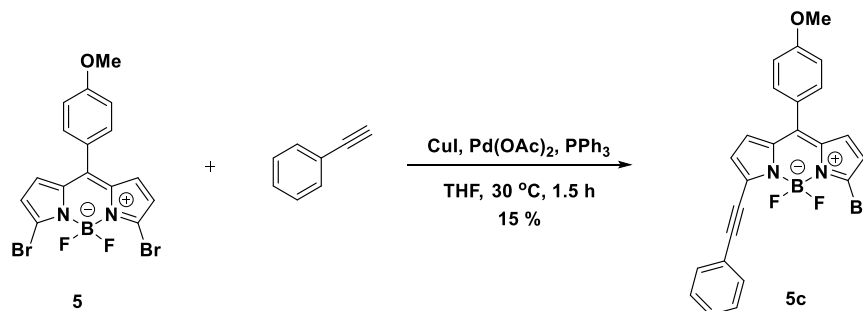

Under nitrogen atmosphere, **5** (37.0 mg, 0.082 mmol), phenylacetylene (10.0 mg, 0.098 mmol),

cuprous iodide (1.0 mg, 0.004 mmol)、 palladium acetate (1.1 mg, 0.004 mmol)、 triphenyl phosphine (2.1 mg, 0.008 mmol) and Et<sub>3</sub>N (34 μL, 0.246 mmol) was dissolved in anhydrous THF (2 mL). Then the reaction was remained 30 °C for 1.5 h. The reaction solution was concentrated *in vacuo*. The crude product was purified with thin layer chromatography on silica gel (PE: Ether = 2: 1) to give **5c** (5.8 mg, 15%) as a purple-red solid.

<sup>1</sup>H NMR (400 MHz, CDCl<sub>3</sub>) δ 7.67-7.69 (m, 2H), 7.47-7.49 (m, 2H), 7.38-7.40 (dd, *J* = 5.2, 1.9 Hz, 3H), 7.03-7.05 (d, *J* = 8.7 Hz, 2H), 6.90-6.92 (d, *J* = 4.2 Hz, 1H), 6.82-6.83 (d, *J* = 4.3 Hz, 1H), 6.72-6.73 (d, *J* = 4.3 Hz, 1H), 6.53-6.54 (d, *J* = 4.3 Hz, 1H), 3.91 (s, 3H).

<sup>13</sup>C NMR (101 MHz, CDCl<sub>3</sub>) δ 161.9, 142.8, 137.7, 136.1, 135.8, 132.3, 131.4, 130.9, 130.7, 129.6, 129.0, 128.4, 128.2, 125.6, 123.9, 122.1, 114.1, 102.4, 82.8, 55.5.

HRMS: (ESI) *m/z*: Calculated for C<sub>24</sub>H<sub>16</sub>BBrF<sub>2</sub>N<sub>2</sub>NaO [M+Na]<sup>+</sup> 499.0404, found 499.0418.

### General procedure for the synthesis of compounds **5a**, **5d-5f**

Compound **5** was dissolved in anhydrous acetonitrile to a final concentration of 0.02 M. The solution was placed under a N<sub>2</sub> atmosphere. Then, aniline (1.1 equiv.) or 2,4-dimethoxyaniline (1.1 equiv.) or methyl 4-aminobenzoate (1.1 equiv.) or methyl 5-amino-2-methoxybenzoate (1.1 equiv.) was added. The reaction mixture was stirred at room temperature for several hours. After which consumption of starting material was confirmed by TLC, the solution was concentrated *in vacuo*. The residue was purified with thin layer chromatography to afford the desired product.

### Synthesis of compound **5a**

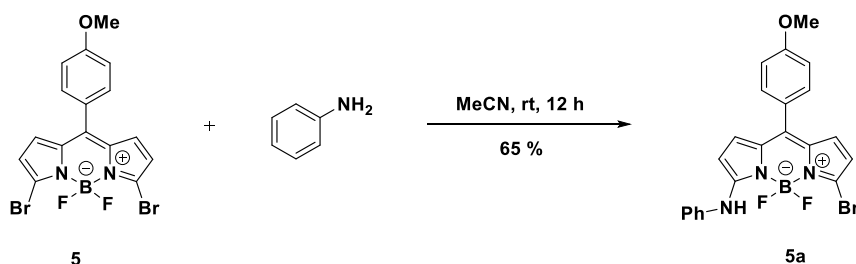

340 mg (0.74 mmol) of **5** was converted to the **5a** (226 mg, 65%), the reaction was stirred at room temperature for 12 h. The product (PE: EA = 10: 1) as a red solid, via the general procedure.

<sup>1</sup>H NMR (400 MHz, CDCl<sub>3</sub>) δ 8.12 (s, 1H), 7.39-7.44 (m, 5H), 7.27 (s, 1H), 7.24-7.25 (m, 1H), 6.98-7.01 (m, 2H), 6.94-6.95 (d, *J* = 4.9 Hz, 1H), 6.43-6.45 (d, *J* = 4.8 Hz, 2H), 6.35-6.36 (d, *J* = 3.9 Hz, 1H), 3.88 (s, 3H).

<sup>13</sup>C NMR (101 MHz, CDCl<sub>3</sub>) δ 160.7, 158.7, 137.3, 135.5, 133.9, 133.3, 133.0, 131.7, 129.8, 126.1, 125.9, 122.5, 122.0, 117.2, 116.7, 113.8, 111.6, 55.4.

HRMS: (ESI) *m/z*: Calculated for C<sub>22</sub>H<sub>17</sub>BBrF<sub>2</sub>N<sub>3</sub>NaO [M+Na]<sup>+</sup> 490.0512, found 490.0529.

### Synthesis of compound **5d**

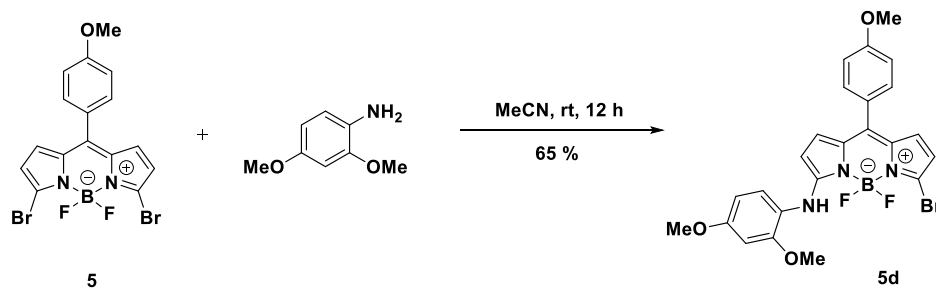

10 mg (0.022 mmol) of **5** was converted to the **5d** (7.5 mg, 65%), the reaction was stirred at room temperature for 12 hours. The product as a red solid, via the general procedure. The solid was purified with toluene.

**<sup>1</sup>H NMR** (400 MHz, CDCl<sub>3</sub>) δ 8.12 (s, 1H), 7.38-7.41 (d, *J* = 8.7 Hz, 2H), 7.21-7.23 (d, *J* = 8.6 Hz, 1H), 7.17-7.18 (d, *J* = 7.4 Hz, 1H), 6.97-6.99 (d, *J* = 8.7 Hz, 2H), 6.90-6.91 (d, *J* = 5.0 Hz, 1H), 6.54-6.55 (d, *J* = 2.5 Hz, 1H), 6.48-6.51 (dd, *J* = 8.7, 2.5 Hz, 1H), 6.32-6.39 (m, 2H), 3.87 (s, 6H), 3.83 (s, 3H).

**<sup>13</sup>C NMR** (101 MHz, CDCl<sub>3</sub>) δ 160.6, 159.2, 158.9, 152.9, 135.3, 134.0, 133.3, 131.7, 129.0, 128.2, 126.2, 123.4, 121.0, 119.9, 116.8, 113.8, 112.1, 104.2, 99.4, 55.9, 55.6, 55.4.

**HRMS:** (ESI) *m/z*: Calculated for C<sub>24</sub>H<sub>22</sub>BBBrF<sub>2</sub>N<sub>3</sub>O<sub>3</sub> [M+H]<sup>+</sup> 528.0904, found 528.0910.

#### Synthesis of compound **5e**

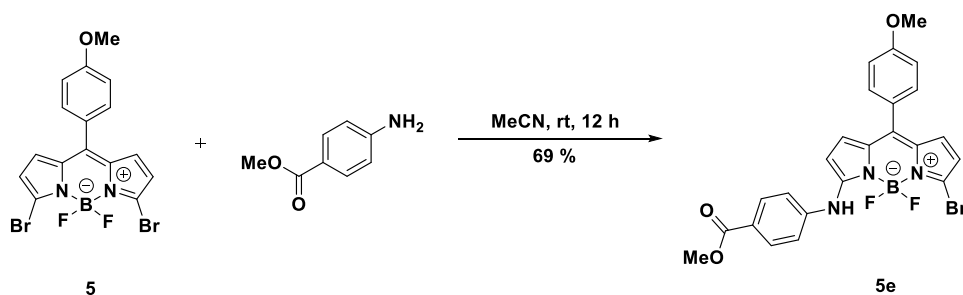

55 mg (0.12 mmol) of **5** was converted to the **5e** (44 mg, 69%), the reaction was stirred at room temperature for 5 h. The product as a red solid, via the general procedure. (PE: DCM = 1: 2)

**<sup>1</sup>H NMR** (400 MHz, CDCl<sub>3</sub>) δ 8.21 (s, 1H), 8.07-8.09 (d, *J* = 8.6 Hz, 2H), 7.41-7.43 (d, *J* = 8.6 Hz, 2H), 7.27-7.29 (d, *J* = 8.6 Hz, 2H), 6.98-7.01 (m, 3H), 6.54-6.55 (d, *J* = 4.9 Hz, 1H), 6.50-6.51 (d, *J* = 3.9 Hz, 1H), 6.37-6.38 (d, *J* = 3.9 Hz, 1H), 3.92 (s, 3H), 3.88 (s, 3H).

**<sup>13</sup>C NMR** (101 MHz, CDCl<sub>3</sub>) δ 166.1, 161.0, 157.0, 141.7, 135.5, 135.3, 134.0, 132.5, 131.8, 131.4, 126.7, 125.7, 123.5, 120.4, 118.6, 118.0, 113.9, 111.0, 55.4, 52.2.

**HRMS:** (ESI) *m/z*: Calculated for C<sub>24</sub>H<sub>19</sub>BBBrF<sub>2</sub>N<sub>3</sub>NaO<sub>3</sub> [M+Na]<sup>+</sup> 548.0567, found 548.0582.

#### Synthesis of compound **5f**

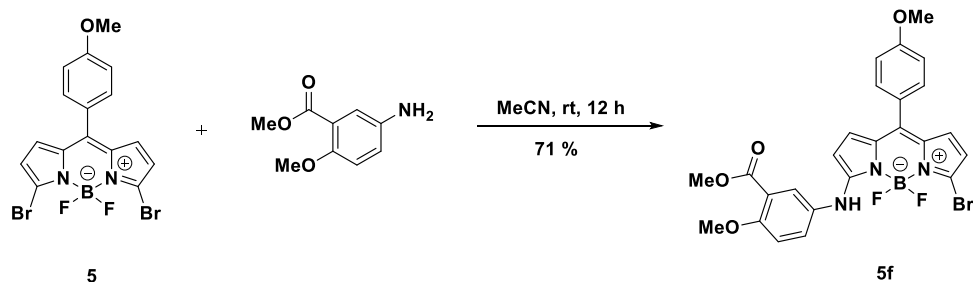

46 mg (0.10 mmol) of **5** was converted to the **5f** (40 mg, 71%), the reaction was stirred at room temperature for 12 h. The product (PE: Acetone = 5: 1) as a red solid, via the general procedure.

**<sup>1</sup>H NMR** (400 MHz, CDCl<sub>3</sub>) δ 7.98 (s, 1H), 7.45-7.75 (d, *J* = 2.9 Hz, 1H), 7.36-7.41 (ddd, *J* = 8.8, 6.2, 2.4 Hz, 3H), 7.02-7.04 (d, *J* = 8.9 Hz, 1H), 6.97-6.99 (m, 2H), 6.92-6.93 (d, *J* = 4.9 Hz, 1H), 6.43 (d, *J* = 3.9 Hz, 1H), 6.34-6.35 (d, *J* = 3.9 Hz, 1H), 6.27-6.28 (d, *J* = 4.9 Hz, 1H), 3.93 (s, 3H), 3.90 (s, 3H), 3.87 (s, 3H).

**<sup>13</sup>C NMR** (101 MHz, CDCl<sub>3</sub>) δ 165.4, 160.8, 159.2, 157.5, 135.6, 133.9, 133.4, 133.0, 131.7, 129.7, 128.4, 126.8, 125.9, 122.0, 121.0, 117.2, 116.7, 113.8, 113.3, 111.2, 56.4, 55.4, 52.3.

**HRMS:** (ESI) *m/z*: Calculated for C<sub>25</sub>H<sub>21</sub>BBBrF<sub>2</sub>N<sub>3</sub>NaO<sub>4</sub> [M+Na]<sup>+</sup> 578.0673, found 578.0697.

### General procedure for the synthesis of compounds **5g-5i**

The reaction was placed under a N<sub>2</sub> atmosphere. Next, **5** (1.0 equiv.) and palladium acetate (0.5 equiv.) was added. Then BINAP (0.75 equiv.) was added, followed by cesium carbonate (1.4 equiv.) and methyl-3-aminothiophene-2-carboxylate (1.2 equiv.) or 3-aminothiophene-2-carboxylic acid (1.2 equiv.) or 3-aminothiophene-2-carboxamide (1.2 equiv.) was added. The reaction was dissolved in anhydrous toluene to a final concentration of 0.02 M. The reaction was heated for several minutes. After which consumption of starting material was confirmed by TLC, the solution was concentrated *in vacuo*. The residue was purified with thin layer chromatography to afford the desired product.

### Synthesis of compound **5g**

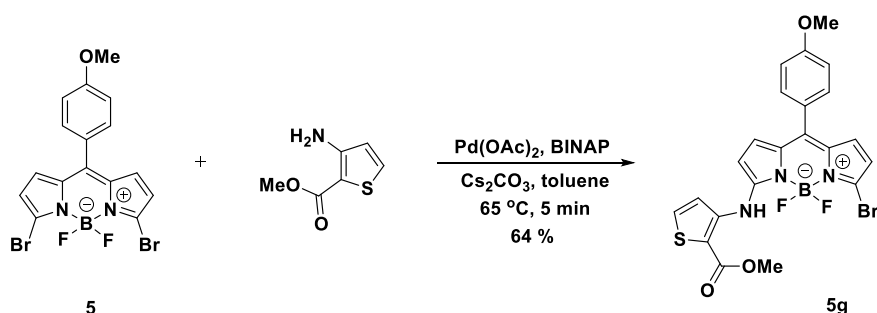

24 mg (0.05 mmol) of **5** was converted to the **5g** (18 mg, 64%), the product as a red solid, via the general procedure. The reaction was heated to 65 °C for 5 minutes. The solid was purified with PE: Toluene = 1: 1 to toluene.

**<sup>1</sup>H NMR** (600 MHz, CDCl<sub>3</sub>) δ 10.51 (s, 1H), 7.54-7.55 (d, *J* = 5.4 Hz, 1H), 7.42-7.43 (m, 2H), 7.22-7.23 (d, *J* = 5.4 Hz, 1H), 6.99-7.01 (m, 3H), 6.57-6.58 (d, *J* = 4.8 Hz, 1H), 6.52 (d, *J* = 4.0 Hz, 1H), 6.38 (d, *J* = 4.0 Hz, 1H), 4.00 (s, 3H), 3.89 (s, 3H).

**<sup>13</sup>C NMR** (151 MHz, CDCl<sub>3</sub>) δ 163.3, 161.0, 155.8, 143.1, 136.1, 135.2, 134.2, 132.4, 132.0, 131.8,

125.9, 124.1, 120.1, 120.0, 118.3, 113.9, 113.2, 110.9, 55.4, 52.5.

**HRMS:** (ESI)  $m/z$ : Calculated for  $C_{22}H_{17}BBBrF_2N_3NaO_3S$   $[M+Na]^+$  554.0131, found 554.0150.

### Synthesis of compound **5h**

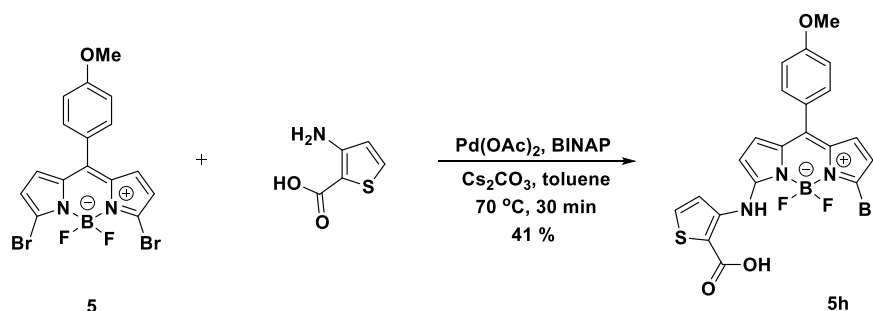

39 mg (0.086 mmol) of **5** was converted to the **5h** (18 mg, 41%), the product (DCM: MeOH = 10: 1) as a red solid, via the general procedure. The reaction was heated to  $70\text{ }^\circ C$  for 30 minutes.

**$^1H$  NMR** (400 MHz, DMSO)  $\delta$  7.61-7.62 (d,  $J = 5.4$  Hz, 1H), 7.41-7.43 (d,  $J = 8.5$  Hz, 2H), 7.30-7.32 (d,  $J = 5.3$  Hz, 1H), 7.06-7.08 (d,  $J = 8.6$  Hz, 2H), 7.01-7.03 (d,  $J = 4.9$  Hz, 1H), 6.91-6.92 (d,  $J = 5.0$  Hz, 1H), 6.32-6.33 (d,  $J = 3.5$  Hz, 1H), 6.23-6.24 (d,  $J = 3.4$  Hz, 1H), 4.11 (s, 1H), 3.83 (s, 3H).

**$^{13}C$  NMR** (101 MHz, DMSO)  $\delta$  160.0, 158.1, 141.8, 135.5, 133.4, 133.3, 131.6, 128.4, 128.0, 125.9, 123.2, 120.4, 118.3, 116.0, 115.2, 114.0, 112.7, 112.0, 55.3.

**HRMS:** (ESI)  $m/z$ : Calculated for  $C_{21}H_{15}BBBrF_2N_3NaO_3S$   $[M+Na]^+$  539.9975, found 539.9962.

### Synthesis of compound **5i**

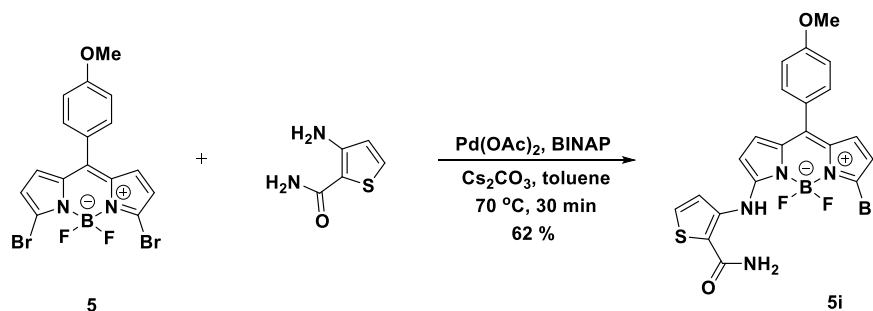

20 mg (0.043 mmol) of **5** was converted to the **5i** (14 mg, 62%), the product (DCM: MeOH = 50: 1) as a red solid, via the general procedure. The reaction was heated to  $70\text{ }^\circ C$  for 10 minutes.

**$^1H$  NMR** (400 MHz, DMSO)  $\delta$  11.82 (s, 1H), 7.86-7.87 (d,  $J = 5.4$  Hz, 1H), 7.45-7.48 (dd,  $J = 6.9, 3.6$  Hz, 3H), 7.09-7.13 (dd,  $J = 10.2, 6.9$  Hz, 3H), 6.92-6.94 (d,  $J = 5.0$  Hz, 1H), 6.44 (d,  $J = 2.4$  Hz, 2H), 3.84 (s, 3H).

**$^{13}C$  NMR** (101 MHz, DMSO)  $\delta$  164.9, 160.5, 156.4, 141.4, 136.1, 133.2, 133.2, 132.3, 131.7, 130.1, 125.1, 121.9, 120.9, 117.3, 116.2, 115.4, 114.1, 113.7, 55.3.

**HRMS** (ESI)  $m/z$ : Calculated for  $C_{21}H_{16}BBBrF_2N_4NaO_2S$   $[M+Na]^+$  539.0134, found 539.0137.

### General procedure for the synthesis of compounds **6a-6i**

The reaction was placed under a  $N_2$  atmosphere. Next, **5a-5i** (1.0 equiv.) and palladium acetate (0.5 equiv.) was added. Then BINAP (0.75 equiv.) was added, followed by cesium carbonate (1.4 equiv.) and **2** (1.2 equiv.) was added. The reaction was dissolved in anhydrous toluene to a final



concentration of 0.02 M. The reaction was heated for several minutes. After which consumption of starting material was confirmed by TLC, the solution was concentrated *in vacuo*. The residue was purified with thin layer chromatography to afford the desired product.

### Synthesis of compound **6a**

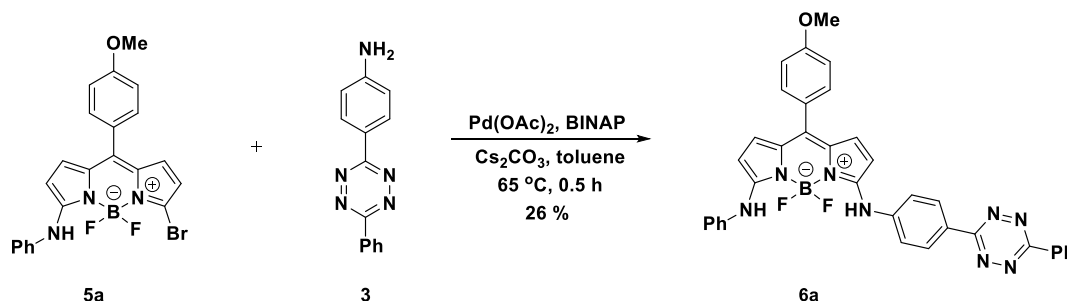

62 mg (0.132 mmol) of **5a** was converted to the **6a** (22 mg, 26%), the product (PE: EA = 5: 1) as a blue-purple solid, via the general procedure. The reaction was heated to 65 °C for 30 minutes.

**<sup>1</sup>H NMR** (600 MHz, CDCl<sub>3</sub>) δ 8.63-8.65 (d, *J* = 8.0 Hz, 4H), 7.68 (s, 1H), 7.61-7.63 (t, *J* = 5.88 Hz, 4H), 7.46-7.47 (d, *J* = 8.3 Hz, 2H), 7.39-7.40 (m, 4H), 7.15-7.17 (t, *J* = 7.2 Hz, 1H), 7.00-7.02 (d, *J* = 8.3 Hz, 2H), 6.80-6.81 (d, *J* = 4.3 Hz, 1H), 6.71-6.72 (d, *J* = 4.0 Hz, 1H), 6.43-6.44 (d, *J* = 4.1 Hz, 1H), 6.32-6.33 (d, *J* = 4.3 Hz, 1H), 3.90 (s, 3H).

**<sup>13</sup>C NMR** (151 MHz, CDCl<sub>3</sub>) δ 163.5, 160.6, 156.9, 154.3, 148.2, 144.3, 138.9, 133.7, 132.4, 132.0, 131.7, 131.3, 130.3, 129.6, 129.3, 128.9, 127.8, 127.2, 126.6, 125.0, 124.4, 123.6, 120.9, 118.1, 113.8, 106.1, 103.8, 55.4.

**HRMS:** (ESI) *m/z*: Calculated for C<sub>36</sub>H<sub>27</sub>BF<sub>2</sub>N<sub>8</sub>O [M+H]<sup>+</sup> 636.2370, found 636.2396.

### Synthesis of compound **6b**

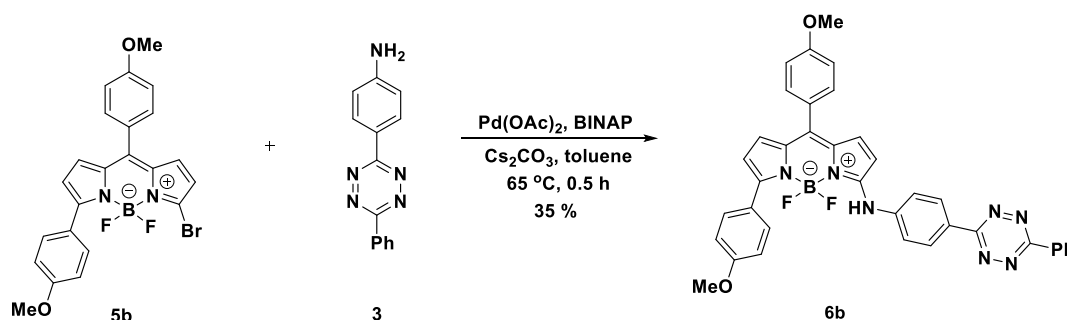

8 mg (0.016 mmol) of **5b** was converted to the **6b** (3.7 mg, 35%), the product (PE: DCM = 1.5: 1) as a blue-purple solid, via the general procedure. The was heated to 65 °C for 30 minutes.

**<sup>1</sup>H NMR** (400 MHz, CDCl<sub>3</sub>) δ 8.63-8.68 (m, 4H), 8.18 (s, 1H), 7.83-7.85 (d, *J* = 8.8 Hz, 2H), 7.62-7.65 (m, 3H), 7.49-7.51 (d, *J* = 8.6 Hz, 2H), 7.41-7.43 (d, *J* = 8.8 Hz, 2H), 6.99-7.04 (m, 5H), 6.69-6.70 (d, *J* = 4.0 Hz, 1H), 6.59-6.60 (d, *J* = 4.7 Hz, 1H), 6.48-6.49 (d, *J* = 4.0 Hz, 1H), 3.91 (s, 3H), 3.88 (s, 3H).

**<sup>13</sup>C NMR** (101 MHz, CDCl<sub>3</sub>) δ 163.7, 163.3, 160.9, 160.0, 155.2, 151.5, 142.4, 136.9, 134.9, 133.7, 132.6, 131.9, 131.8, 131.6, 130.5, 129.6, 129.3, 127.9, 127.5, 126.8, 126.3, 125.5, 120.7, 116.9, 113.8, 113.6, 109.4, 55.4, 55.3.

**HRMS:** (ESI) *m/z*: Calculated for C<sub>37</sub>H<sub>28</sub>BF<sub>2</sub>N<sub>7</sub>NaO<sub>2</sub> [M+Na]<sup>+</sup> 674.2264, found 674.2247.

### Synthesis of compound **6c**

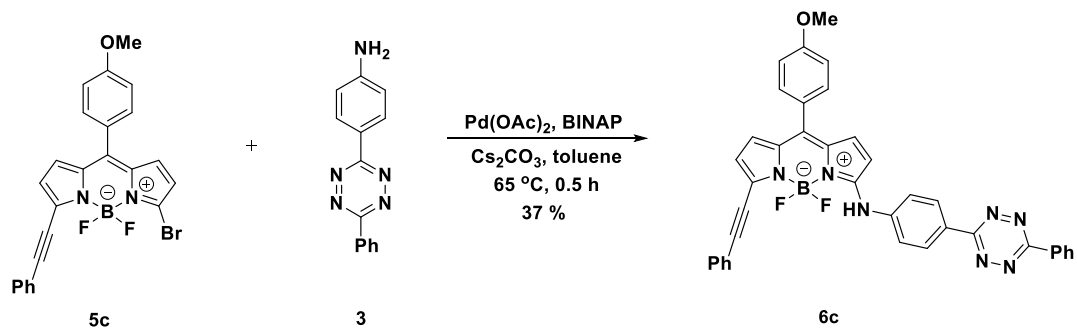

5 mg (0.010 mmol) of **5c** was converted to the **6c** (2.5 mg, 37%), the product (100% Toluene) as a blue-purple solid, via the general procedure. The reaction was heated to 65 °C for 30 minutes.

**<sup>1</sup>H NMR** (400 MHz, CDCl<sub>3</sub>) δ 8.71-8.73 (d, *J* = 8.7 Hz, 2H), 8.64-8.67 (dd, *J* = 7.8, 1.8 Hz, 2H), 8.37 (s, 1H), 7.62-7.66 (m, 5H), 7.46-7.51 (dd, *J* = 12.9, 8.7 Hz, 4H), 7.35-7.37 (d, *J* = 7.1 Hz, 3H), 7.00-7.05 (t, *J* = 6.3 Hz, 3H), 6.64-6.67 (t, *J* = 4.6 Hz, 2H), 6.60-6.61 (d, *J* = 4.0 Hz, 1H), 3.90 (s, 3H).

**<sup>13</sup>C NMR** (101 MHz, CDCl<sub>3</sub>) δ 163.8, 163.2, 160.9, 156.8, 141.8, 135.2, 135.1, 134.4, 133.3, 132.7, 131.8, 131.7, 129.6, 129.3, 128.5, 128.3, 128.2, 128.1, 127.9, 126.4, 123.1, 123.0, 121.3, 120.9, 113.9, 111.0, 96.6, 83.1, 77.2, 55.4 ppm.

**HRMS:** (ESI) *m/z*: Calculated for C<sub>38</sub>H<sub>27</sub>BF<sub>2</sub>N<sub>7</sub>O [M+H]<sup>+</sup> 646.2403, found 646.2342.

### Synthesis of compound **6d**

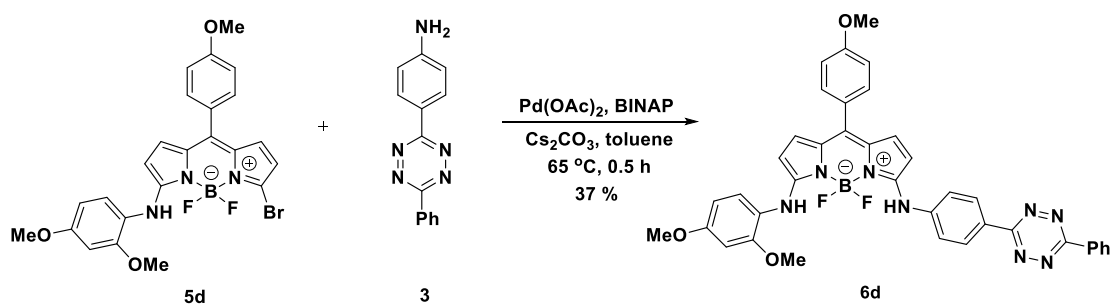

11 mg (0.02 mmol) of **5d** was converted to the **6d** (5.4 mg, 37%), the product (Toluene: DCM = 2: 1) as a blue solid, via the general procedure. The reaction was heated to 65 °C for 30 minutes.

**<sup>1</sup>H NMR** (400 MHz, CDCl<sub>3</sub>) δ 8.61-8.65 (m, 4H), 7.82 (s, 1H), 7.66 (s, 1H), 7.61-7.62 (m, 4H), 7.44-7.47 (d, *J* = 8.7 Hz, 2H), 7.38-7.40 (d, *J* = 8.9 Hz, 2H), 6.99-7.01 (d, *J* = 8.7 Hz, 2H), 6.80-6.81 (d, *J* = 4.6 Hz, 1H), 6.55-6.66 (d, *J* = 4.2 Hz, 1H), 6.56 (d, *J* = 2.6 Hz, 1H), 6.49-6.52 (dd, *J* = 8.7, 2.6 Hz, 1H), 6.39-6.40 (d, *J* = 4.2 Hz, 1H), 6.27-6.28 (d, *J* = 4.7 Hz, 1H), 3.92 (s, 3H), 3.89 (s, 3H), 3.83 (s, 3H).

**<sup>13</sup>C NMR** (101 MHz, CDCl<sub>3</sub>) δ 163.4, 163.3, 160.4, 157.4, 155.1, 151.7, 147.1, 144.7, 132.7, 132.3, 132.0, 131.7, 130.6, 129.6, 129.2, 128.7, 127.7, 126.8, 125.8, 124.5, 121.6, 121.2, 117.8, 115.0, 113.7, 106.6, 104.1, 103.1, 99.4, 56.0, 55.6, 55.4.

**HRMS:** (ESI) *m/z*: Calculated for C<sub>38</sub>H<sub>31</sub>BF<sub>2</sub>N<sub>8</sub>O<sub>3</sub> [M+H]<sup>+</sup> 696.2581, found 696.2607.

### Synthesis of compound **6e**

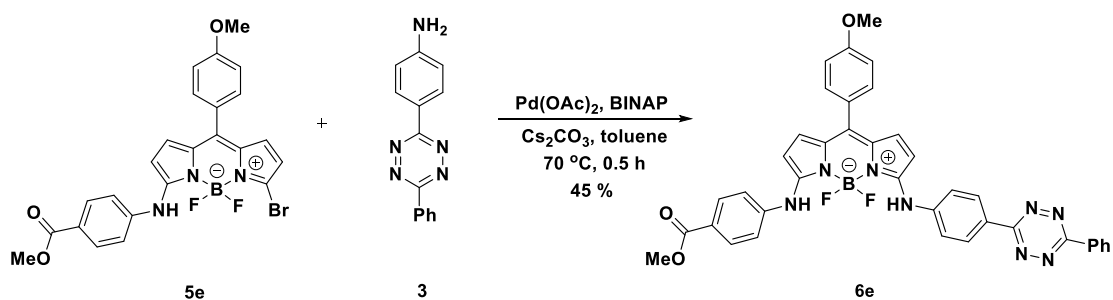

9 mg (0.017 mmol) of **5e** was converted to the **6e** (5.4 mg, 45%), the product (Toluene: DCM = 3: 1) as a blue solid, via the general procedure. The reaction was heated to  $70^\circ\text{C}$  for 30 minutes.

$^1\text{H NMR}$  (400 MHz,  $\text{CDCl}_3$ )  $\delta$  8.63-8.67 (m, 5H), 8.04-8.06 (d,  $J = 8.7$  Hz, 2H), 7.78 (s, 1H), 7.71 (s, 1H), 7.59-7.63 (m, 4H), 7.46-7.48 (d,  $J = 8.7$  Hz, 2H), 7.41-7.43 (d,  $J = 8.8$  Hz, 2H), 7.23 (s, 1H), 7.01-7.03 (d,  $J = 8.7$  Hz, 1H), 6.80-6.82 (t,  $J = 4.2$  Hz, 2H), 6.48-6.49 (d,  $J = 4.4$  Hz, 1H), 6.41-6.42 (d,  $J = 4.5$  Hz, 1H), 3.92 (s, 3H), 3.90 (s, 3H).

$^{13}\text{C NMR}$  (151 MHz,  $\text{CDCl}_3$ )  $\delta$  166.5, 163.6, 163.4, 160.8, 150.9, 150.4, 143.7, 143.6, 134.9, 132.5, 132.0, 131.7, 131.5, 131.4, 129.9, 129.8, 129.7, 129.6, 129.5, 129.3, 127.8, 126.4, 125.9, 124.5, 118.9, 118.1, 113.9, 105.4, 55.4, 52.0.

**HRMS**: (ESI)  $m/z$ : Calculated for  $\text{C}_{38}\text{H}_{29}\text{BF}_2\text{N}_8\text{O}_3$   $[\text{M}+\text{H}]^+$  694.2449, found 694.2449.

### Synthesis of compound **6f**

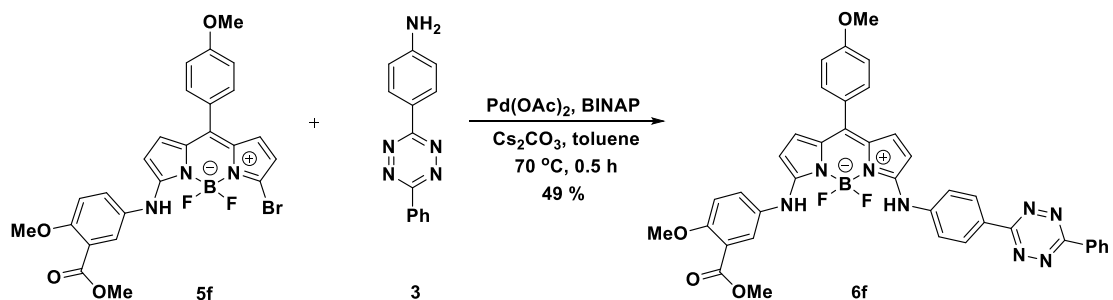

10.8 mg (0.019 mmol) of **5f** was converted to the **6f** (6.9 mg, 49%), the product (PE: DCM: ether = 1: 1: 0.1) as a blue solid, via the general procedure. The reaction was heated to  $70^\circ\text{C}$  for 30 minutes.

$^1\text{H NMR}$  (400 MHz,  $\text{CDCl}_3$ )  $\delta$  8.63-8.65 (d,  $J = 8.7$  Hz, 4H), 7.75-7.76 (d,  $J = 2.9$  Hz, 1H), 7.61-7.66 (m, 4H), 7.45-7.47 (d,  $J = 8.7$  Hz, 2H), 7.38-7.40 (d,  $J = 8.8$  Hz, 3H), 7.00-7.03 (dd,  $J = 8.8, 4.7$  Hz, 4H), 6.78-6.79 (d,  $J = 4.5$  Hz, 1H), 6.70-6.72 (d,  $J = 4.4$  Hz, 1H), 6.42-6.43 (d,  $J = 4.3$  Hz, 1H), 6.14-6.15 (d,  $J = 4.5$  Hz, 1H), 3.93 (s, 3H), 3.91 (s, 3H), 3.89 (s, 3H).

$^{13}\text{C NMR}$  (101 MHz,  $\text{CDCl}_3$ )  $\delta$  165.8, 163.4, 160.6, 156.5, 154.9, 148.0, 144.3, 133.6, 132.4, 132.0, 131.7, 131.4, 131.3, 129.6, 129.5, 129.2, 128.8, 127.7, 127.2, 127.0, 126.6, 125.5, 124.9, 120.8, 118.0, 113.7, 113.3, 105.6, 103.7, 99.9, 56.4, 55.4, 52.3.

**HRMS** (ESI)  $m/z$ : Calculated for  $\text{C}_{39}\text{H}_{31}\text{BF}_2\text{N}_8\text{NaO}_4$   $[\text{M}+\text{Na}]^+$  747.2428, found 747.2435.

### Synthesis of compound **6g**

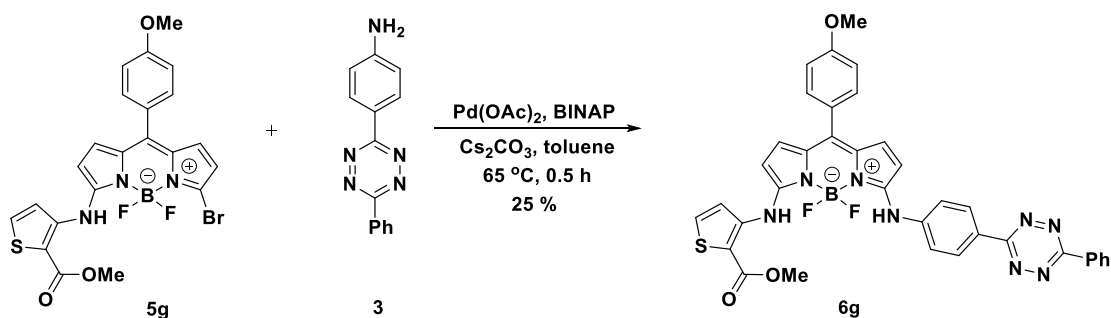

18 mg (0.033 mmol) of **5g** was converted to the **6g** (5.9 mg, 25%), the product (DCM: PE = 2: 1) as a blue-green solid, via the general procedure. The reaction was heated to 65 °C for 30 minutes.

**<sup>1</sup>H NMR** (600 MHz, CDCl<sub>3</sub>) δ 10.26 (s, 1H), 8.64-8.67 (m, 4H), 7.95 (s, 1H), 7.62-7.63 (d, *J* = 7.8 Hz, 3H), 7.49-7.50 (d, *J* = 5.5 Hz, 1H), 7.43-7.47 (dd, *J* = 8.7, 3.5 Hz, 4H), 7.28-7.29 (d, *J* = 5.5 Hz, 2H), 7.01-7.03 (d, *J* = 8.7 Hz, 2H), 6.82-6.83 (d, *J* = 4.5 Hz, 1H), 6.77 (d, *J* = 4.4 Hz, 1H), 6.49 (d, *J* = 4.4 Hz, 1H), 6.35 (d, *J* = 4.4 Hz, 1H), 3.97 (s, 3H), 3.90 (s, 3H).

**<sup>13</sup>C NMR** (151 MHz, CDCl<sub>3</sub>) δ 167.3, 164.4, 163.3, 160.7, 152.1, 149.9, 146.1, 143.6, 132.5, 132.1, 132.0, 131.9, 131.8, 131.3, 129.6, 129.3, 129.0, 128.2, 128.0, 127.9, 126.6, 119.6, 119.5, 113.8, 112.3, 108.6, 106.0, 105.1, 55.4, 52.2.

**HRMS:** (ESI) *m/z*: Calculated for C<sub>36</sub>H<sub>27</sub>BF<sub>2</sub>N<sub>8</sub>NaO<sub>3</sub>S [M+Na]<sup>+</sup> 723.1886, found 723.1921.

#### Synthesis of compound **6h**

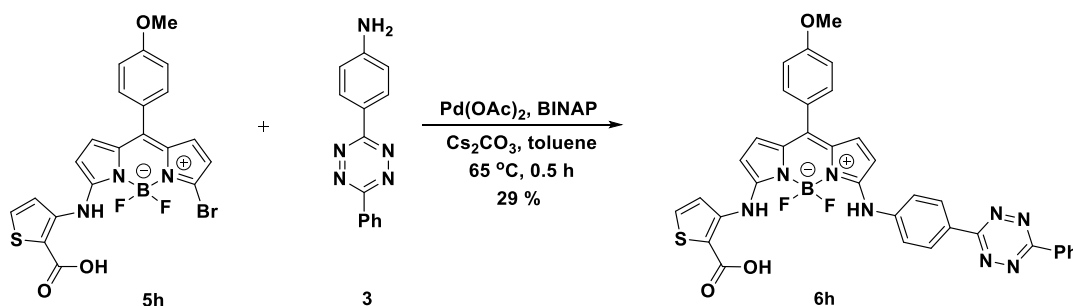

7 mg (0.014 mmol) of **5h** was converted to the **6h** (2.7 mg, 29%), the product (DCM: MeOH = 10: 1) as a blue solid, via the general procedure. The reaction was heated to 65 °C for 30 minutes.

**<sup>1</sup>H NMR** (400 MHz, DMSO) δ 8.49-8.52 (m, 4H), 8.47 (s, 1H), 7.69 (d, *J* = 1.6 Hz, 2H), 7.67-7.68 (d, *J* = 1.7 Hz, 1H), 7.47-7.55 (dd, *J* = 22.2, 8.7 Hz, 5H), 7.29-7.31 (d, *J* = 5.4 Hz, 1H), 7.09-7.11 (d, *J* = 8.6 Hz, 2H), 6.86-6.87 (d, *J* = 4.7 Hz, 1H), 6.61-6.66 (dd, *J* = 14.2, 4.4 Hz, 2H), 6.45-6.46 (d, *J* = 4.2 Hz, 1H), 3.84 (s, 3H).

**<sup>13</sup>C NMR** (151 MHz, DMSO) δ 166.9, 164.7, 162.9, 160.4, 151.6, 149.1, 145.2, 144.3, 133.8, 133.1, 132.4, 132.0, 131.7, 131.6, 130.0, 129.5, 128.9, 128.7, 128.5, 127.4, 125.7, 120.4, 119.8, 114.1, 108.7, 108.2, 105.9, 71.2, 55.3.

**HRMS:** (ESI) *m/z*: Calculated for C<sub>35</sub>H<sub>25</sub>BF<sub>2</sub>N<sub>8</sub>O<sub>3</sub>S [M+H]<sup>+</sup> 685.1995, found 685.1995.

#### Synthesis of compound **6i**

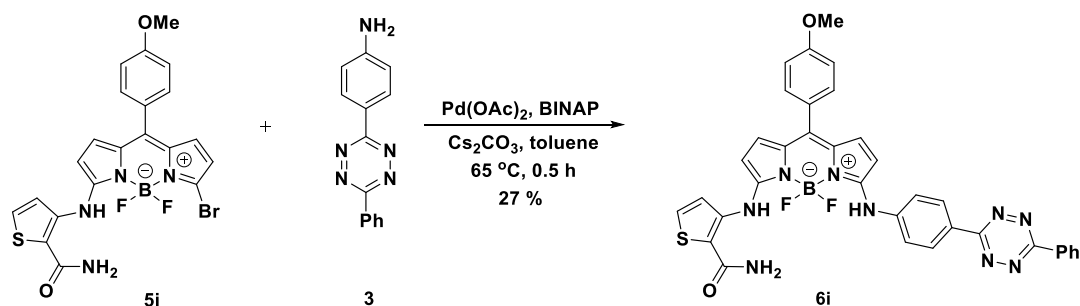

14 mg (0.027 mmol) of **5i** was converted to the **6i** (5.0 mg, 27%), the product (DCM: Acetone = 25:1) as a blue-green solid, via the general procedure. The reaction was heated to 65 °C for 20 minutes. <sup>1</sup>H NMR (400 MHz, CDCl<sub>3</sub>) δ 11.09 (s, 1H), 8.63-8.65 (m, 4H), 7.97 (s, 1H), 7.61-7.63 (dd, *J* = 4.1, 3.3 Hz, 3H), 7.43-7.47 (dd, *J* = 5.2, 3.5 Hz, 4H), 7.40-7.41 (d, *J* = 5.5 Hz, 1H), 7.31-7.33 (d, *J* = 5.5 Hz, 1H), 7.00-7.02 (d, *J* = 8.8 Hz, 2H), 6.75-6.80 (dd, *J* = 12.5, 4.2 Hz, 2H), 6.46-6.47 (d, *J* = 4.5 Hz, 1H), 6.32-6.33 (d, *J* = 4.5 Hz, 1H), 5.50 (s, 2H), 3.89 (s, 3H).

<sup>13</sup>C NMR (101 MHz, CDCl<sub>3</sub>) δ 165.7, 163.5, 163.4, 160.6, 151.1, 148.9, 145.9, 143.7, 135.2, 134.7, 132.4, 132.0, 131.7, 129.6, 129.5, 129.3, 129.1, 128.3, 127.8, 126.6, 125.9, 120.4, 119.5, 113.8, 111.4, 109.2, 105.8, 105.1, 55.5.

HRMS (ESI) *m/z*: Calculated for C<sub>35</sub>H<sub>26</sub>BF<sub>2</sub>N<sub>9</sub>NaO<sub>2</sub>S [M+Na]<sup>+</sup> 708.1890, found 708.1897.

## Measurement of fluorescence quantum yields

Fluorescence quantum yields were measured by creating 2 mM stocks of freshly-purified tetrazine-BODIPY dyes in DMF and reacted with 10-fold excess *trans*-cyclooctenol (TCO) or 100-fold excess cyclopropane at the final concentrations of 2 mM tetrazine-BODIPY dye and 20 mM *trans*-cyclooctenol (TCO) or 200 mM cyclopropane in DMF/H<sub>2</sub>O (V/V 9:1) solution, the reaction mixture was kept at 37 °C, after the reaction completed, then further diluted in DMF/PBS (V/V 1:1) solution to various final concentration. The absorbance and emission spectra of five different concentrations of tetrazine-BODIPY dyes were measured while keeping maximum absorbance under 0.2. The solution of tetrazine-BODIPY dye were excited at 600 nm (5.0 nm slit width,) and emission signal were tracked over the 620-750 nm range (8.0 nm slit width). Emission were measured compared against a control sample lacking *trans*-cyclooctenol (TCO) or cyclopropane. Plotting emission peak height vs. absorbance at 600 nm yielded a line, whose slope corresponds to the fluorescence quantum yield. The same strategy was used for compound **3** ( $\lambda_{\text{ex.}}$  = 530 nm,  $\lambda_{\text{em.}}$  = 530-700 nm). Absolute quantum yields were determined by comparison with the slope of the line measured for cresyl violet in MeOH ( $\Phi_{\text{fl}}$  = 0.54). The reported quantum yields are the average of three sets of measurements. Absorbance spectra were recorded on a TU-1901 spectrometer. Emission spectra were recorded on a Perkin Elmer LS-55 spectrometer. Measurements were made in 1 cm x 1 cm quartz cuvettes with a total sample volume of 2.5 mL.

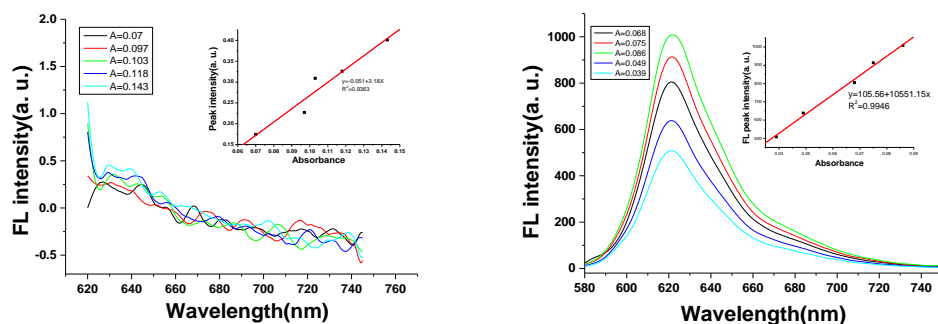

**Figure S1.** The fluorescence quantum yields of **6i** measurement experiment. a) Emission spectra of cresyl violet in MeOH at different absorbances and plot peak height vs. absorbance. b) Emission spectra of **6i** in DMF/PBS(V/V=1:1) at different absorbance and plot peak height vs. absorbance.

**Table S1.** Photophysical Properties of BODIPY-Tetrazine **6a-f**, and Products of **6a-f +7**, **6a-f +8<sup>a</sup>**

| compound    | $\lambda_{\text{abs}}$ [nm] | $\lambda_{\text{em}}$ [nm] | $\Phi_{\text{fl}} [\times 10^{-3}]$ | Turn-on  |
|-------------|-----------------------------|----------------------------|-------------------------------------|----------|
| <b>6a</b>   | 605                         | 624                        | 0.341                               | –        |
| <b>6a+7</b> | 600                         | 625                        | 90.2                                | 279-fold |
| <b>6a+8</b> | 602                         | 627                        | 40.1                                | 118-fold |
| <b>6b</b>   | 576                         | 621                        | 0.774                               | –        |
| <b>6b+7</b> | 560                         | 623                        | 80.2                                | 102-fold |
| <b>6b+8</b> | 567                         | 625                        | 91.3                                | 117-fold |
| <b>6c</b>   | 615                         | 642                        | 0.861                               | –        |
| <b>6c+7</b> | 566                         | 624                        | 0.754                               | 0.9-fold |
| <b>6c+8</b> | 554                         | 620                        | 10.3                                | 12-fold  |
| <b>6d</b>   | 602                         | n.a.                       | n.a                                 | –        |
| <b>6d+7</b> | 600                         | 636                        | 4.83                                | –        |
| <b>6d+8</b> | 600                         | 636                        | 5.74                                | –        |
| <b>6e</b>   | 611                         | 629                        | 0.952                               | –        |
| <b>6e+7</b> | 604                         | 627                        | 150                                 | 158-fold |
| <b>6e+8</b> | 606                         | 629                        | 110                                 | 116-fold |

<sup>a</sup>Measured in DMF/PBS (pH=7.4) (1:1 v/v) at 37 °C.

## Structure of 6d+7 and 6e+7

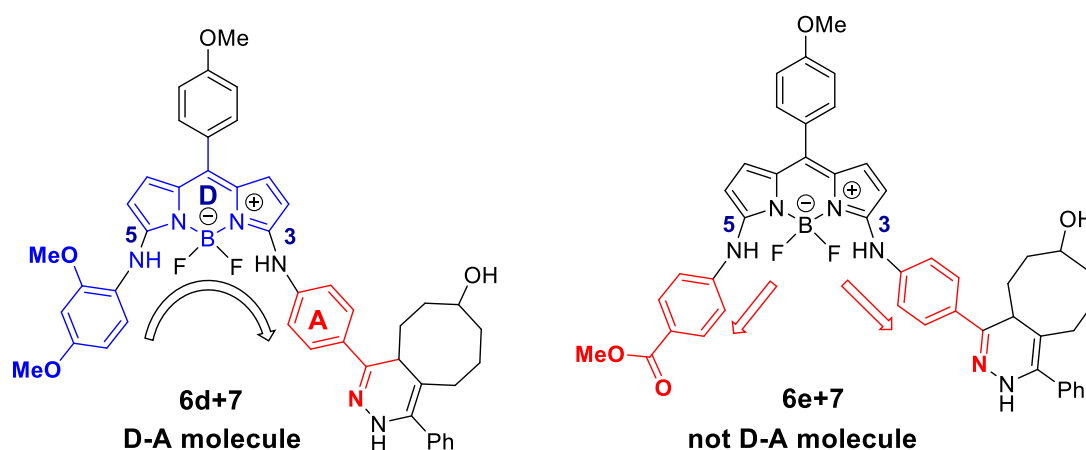

**Scheme S1.** Cycloaddition products of **6d** and **6e** reaction with **7**.

## The stability of compound 6i

The compound **6i** was equally divided into 5 parts and wrapped with silver paper and stored at 4 °C. While measure the stability, take a part created 1 mM stocks of compound **6i** in DMF. Then to a 1 cm x 1 cm quartz cuvette was added 2480  $\mu$ L DMF/PBS (V/V 1:1) solution, next added 20  $\mu$ L 1 mM compound **6i** in DMF and the solution mixed with a pipette, then measured the emission spectra. To the same 1 cm x 1 cm quartz cuvettes was added 20  $\mu$ L 1 mM compound **6i** in DMF, then added 2  $\mu$ L 100 mM TCO in DMF, after the reaction completed, added 2478  $\mu$ L DMF/PBS (V/V 1:1) to the quartz cuvettes with a total volume of 2.5 mL, the solution mixed with a pipette, next measured the emission spectra. The measure time at 0, 7, 15, 22, 30 days. The excitation wavelength at 600 nm, and emission signal was tracked over the 620-750 nm range.

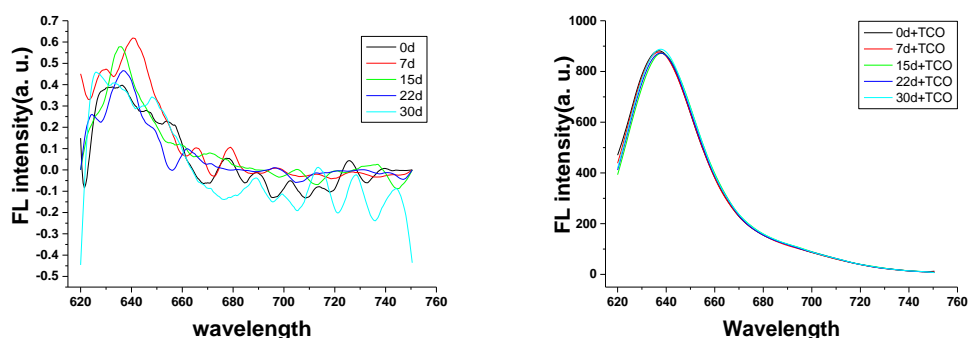

**Figure S2.** The stability of **6i** within a month. a) Emission spectra of compound **6i** within a month. b) Emission spectra of compound **6i**+TCO within one month.

## The biorthogonal reaction kinetic measurements

A 1 mM stock solution of compound **6i** was prepared in DMF was used for the kinetic measurement, and the change of the probe absorption intensity was measured over time. Measurements were immediately started upon the addition of excess TCO **7** (final concentrations of 0.04, 0.06, 0.08

mM) or cyclopropane **8** (final concentrations of 0.8, 1.0, 1.2 mM) to reaction solution. Compound **6i** solutions at 4  $\mu\text{M}$  final concentration in DMF/PBS (V/V 1:1). The peak height of the compound **6i** reacted with TCO **7** at 635 nm and with cyclopropane **8** at 636 nm was tracked over the reaction timeframe by measuring the emission spectra every 25 s for TCO **7** and 5 min for cyclopropane **8**. Reaction rates were obtained by fitting the exponential increase of TCO **7** or cyclopropane **8** as a pseudo first order reaction. According to the time and peak height can obtain the  $t_{1/2}$ , then get the observed reaction rates ( $K_{\text{obs}}$ ), next Plotted  $K_{\text{obs}}$  vs. TCO concentrations yielded a line, the slope of the resulting line was used to determine the second-order rate constant.

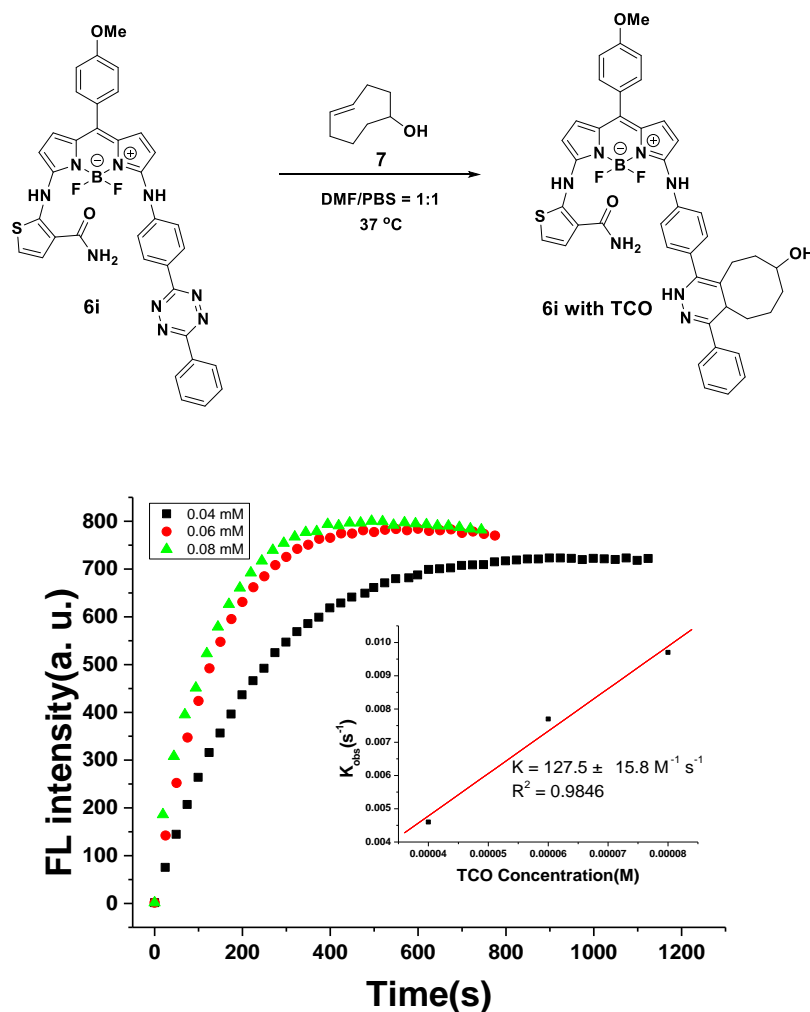

**Figure S3.** Reaction kinetic measurement of compound **6i** with TCO **7** (three separate concentrations in DMF/PBS = 1:1 at 37 °C).



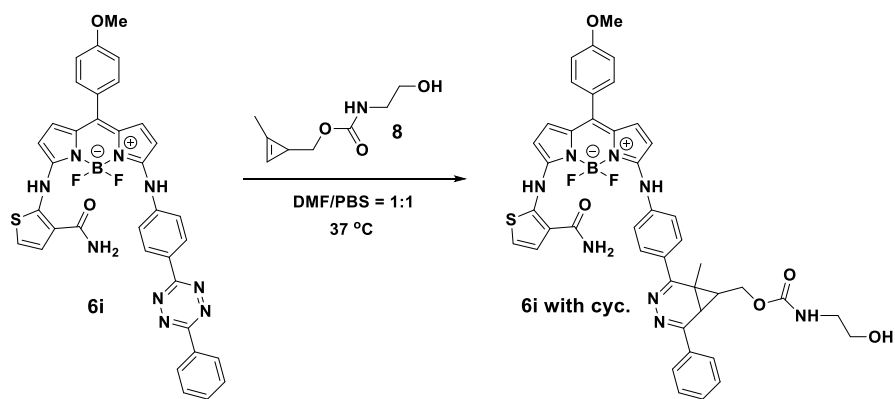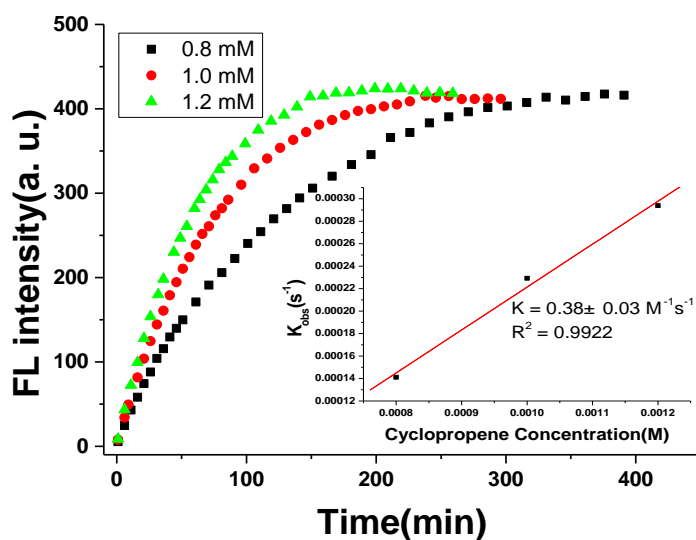

**Figure S4.** Reaction kinetic measurement of compound **6i** with cyclopropene **8** (three separate concentrations in DMF/PBS = 1:1 at 37 °C).

## HPLC characterization of the bioorthogonal reaction between compound **6i** with *trans*-cyclooctenol **7** or cyclopropene **8**

Characterization of the reaction between probe **6i** and TCO **7**

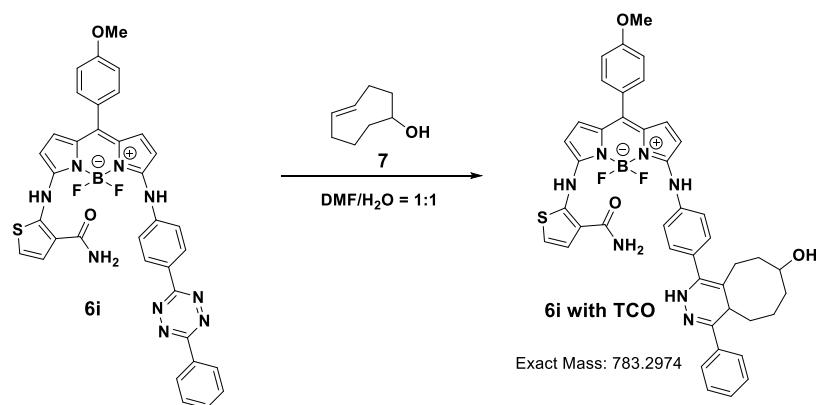

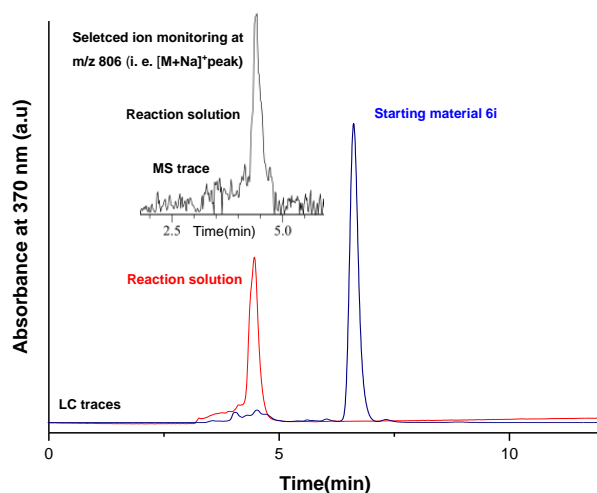

**Figure S5.** HPLC traces of biorthogonal product Bodipy probe **6i** with TCO (red) and probe **6i** (blue) at  $\lambda = 370$  nm and associated mass traces of the reaction solution between **6i** (0.08 mM) and **7** (1 mM) after 3 min. at r.t. in DMF/H<sub>2</sub>O = 1:1. MS trace of the reaction solution, selected ion monitoring at  $m/z$  806 (i.e.  $[M+Na]^+$  peak) (black).

### Characterization of the reaction between probe **6i** and TCO **8**

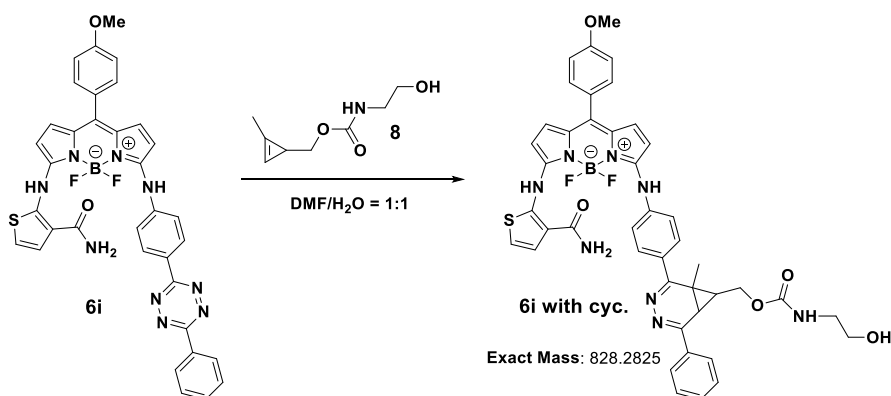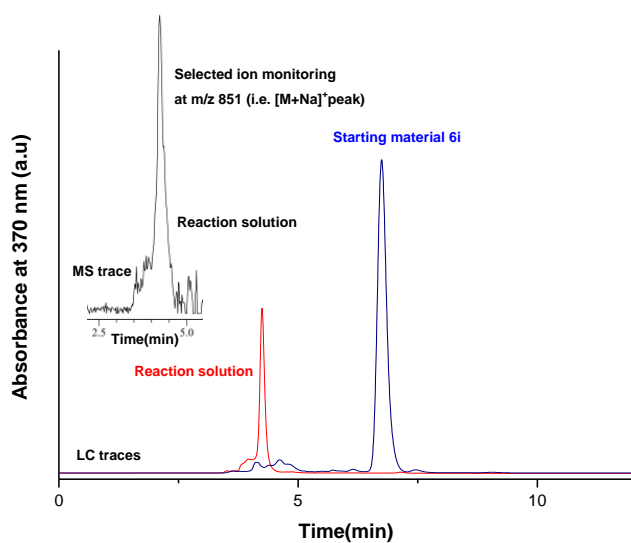

**Figure S6.** HPLC traces of biorthogonal product Bodipy probe **6i** with **CYC**. (red) and probe **6i** (blue) at  $\lambda = 370$  nm and associated mass traces of the reaction solution between **6i** (0.08 mM) and **8** (1 mM) after 10 min. at r.t. in DMF/H<sub>2</sub>O = 1:1. MS trace of the reaction solution, selected ion monitoring at  $m/z$  851 (i.e. [M+Na]<sup>+</sup> peak) (black).

## Experimental procedures for fluorescence imaging

### HEK293T cells culture

For labeling experiments, HEK293T cells were cultured in high-glucose DMEM, supplemented with 10% fetal bovine serum (FBS). Cells were maintained in 100-mm culture dishes, in a 5% CO<sub>2</sub> atmosphere at 37 °C. Cells were allowed to grow at 80% confluency every 2-4 days.

### Mannosamine labeling in HEK239T cell

For live-cell imaging, cells were seeded on a 2 mL confocal culture dish, next added 2  $\mu$ L 100 mM peracetylated *N*-(4-CYCP)-Mannosamine **10** or unmodified peracetylated *N*-acetylmannosamine in DMSO cultured for 72 h, The cells were then washed with 3 x 1 mL PBS and added DMEM, next added 2  $\mu$ L 10 mM freshly **6i** in DMSO and incubated in a 5% CO<sub>2</sub> atmosphere at 37 °C, then after 1 h, the cells directly subjected to confocal microscopy no-wash labeling imaging.

### A549 cells culture

For labeling experiments, A549 cells were cultured in RPMI-1640 medium, supplemented with 10% fetal bovine serum (FBS). Cells were maintained in 100-mm culture dishes, in a 5% CO<sub>2</sub> atmosphere at 37 °C. Cells were allowed to grow at 80% confluency every 2-4 days.

### Phospholipid labeling in A549

For live-cell imaging, cells were seeded on a 2 mL confocal culture dish, next added 2  $\mu$ L 100 mM *trans*-cyclooctene-DOPE **9** in DMSO cultured for 24 h, the cells were then washed with 3 x 1 mL PBS and the RPMI-1640 medium, next added 2  $\mu$ L 10 mM freshly **6i** in DMSO and incubated in a 5% CO<sub>2</sub> atmosphere at 37 °C, after 5 min, the cells directly subjected to confocal microscopy no-wash labeling imaging.

## NMR spectra

### Compound 3 <sup>1</sup>H NMR

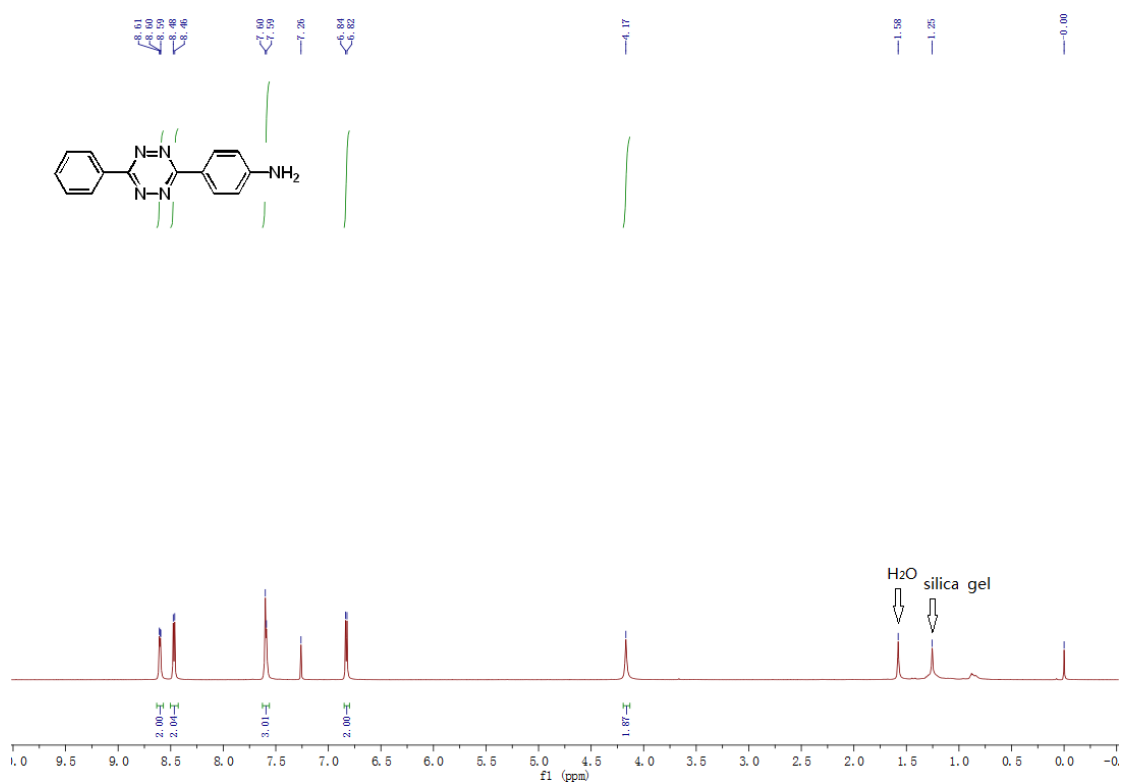

### Compound 3 <sup>13</sup>C NMR

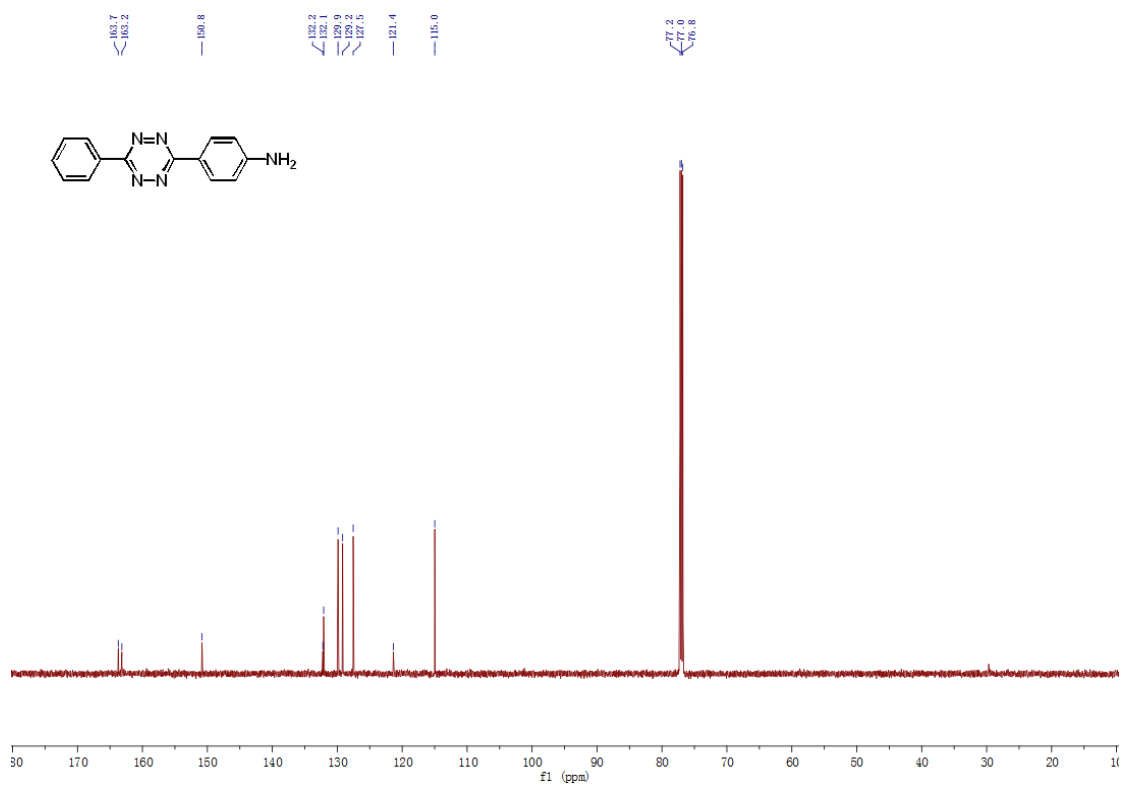

### Compound 4 <sup>1</sup>H NMR

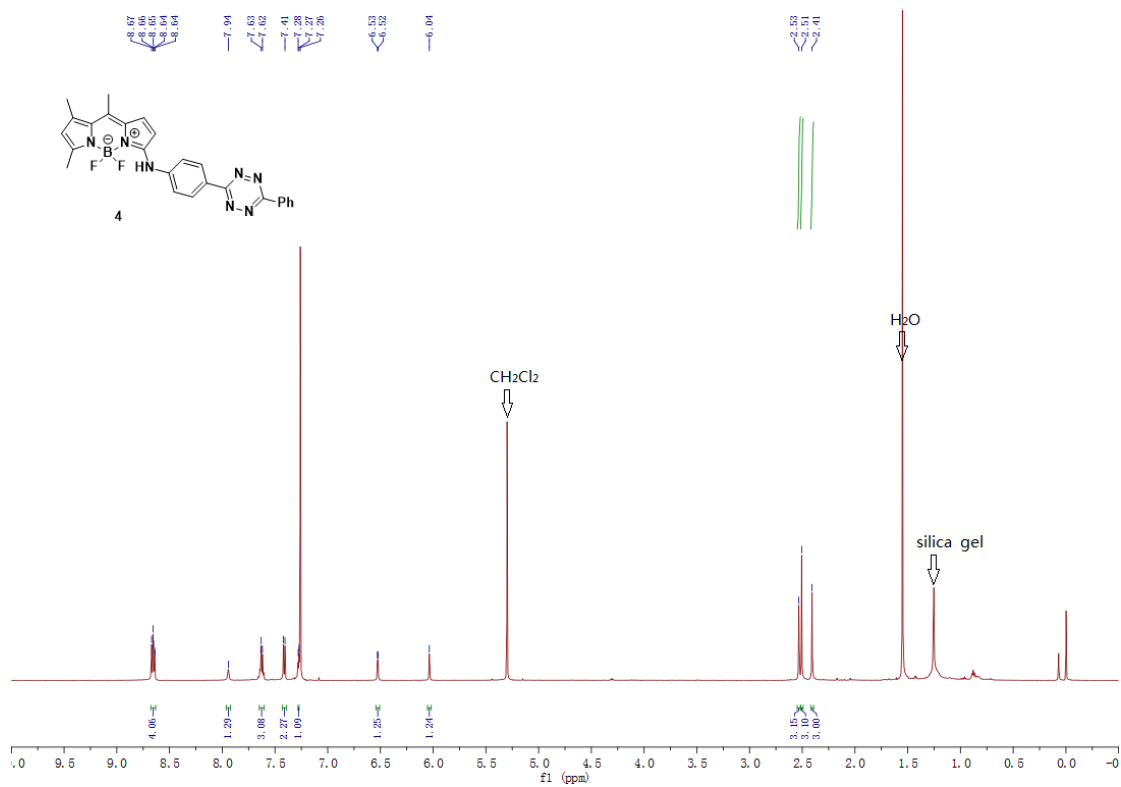

### Compound 4 <sup>13</sup>C NMR

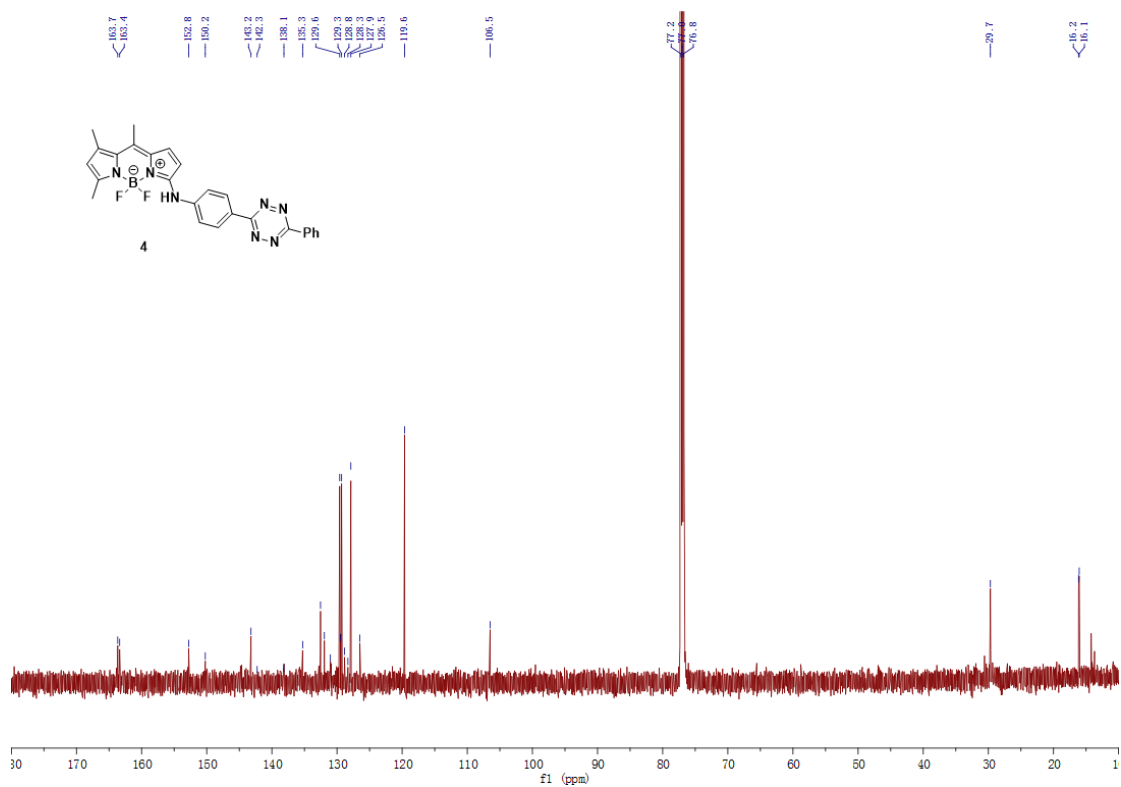

### Compound 5 <sup>1</sup>H NMR

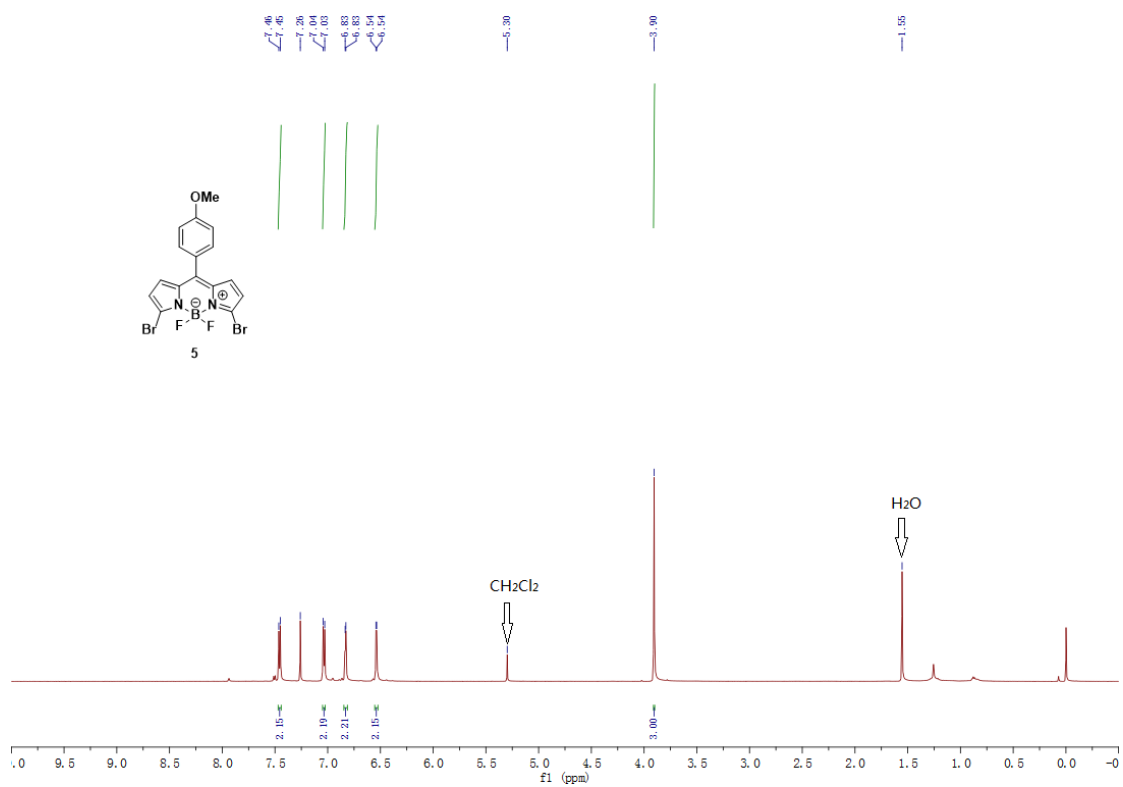

### Compound 5 <sup>13</sup>C NMR

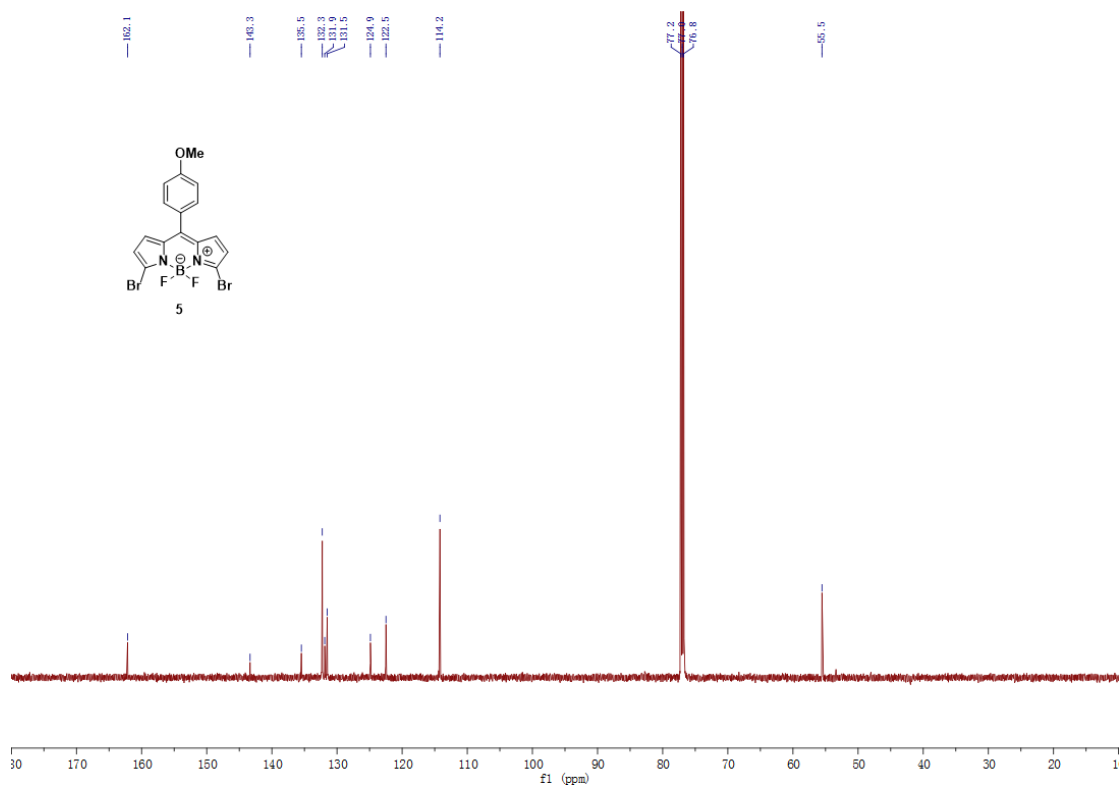

### Compound 5a <sup>1</sup>H NMR

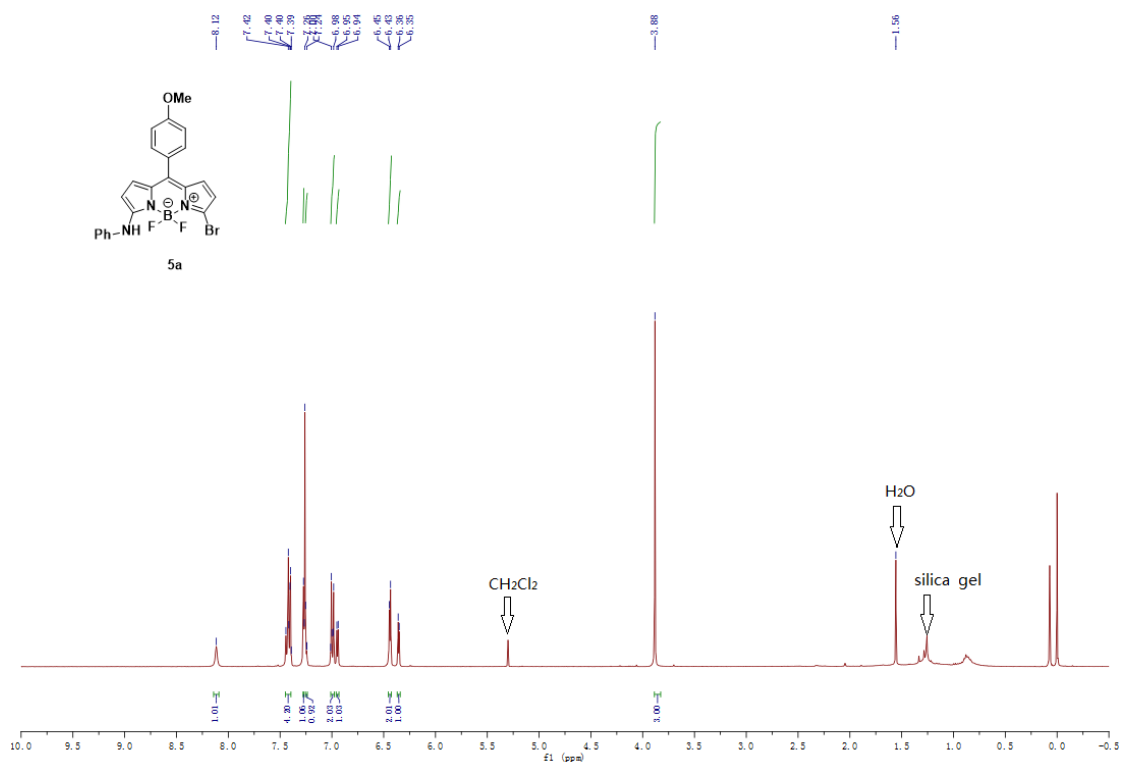

### Compound 5a <sup>13</sup>C NMR

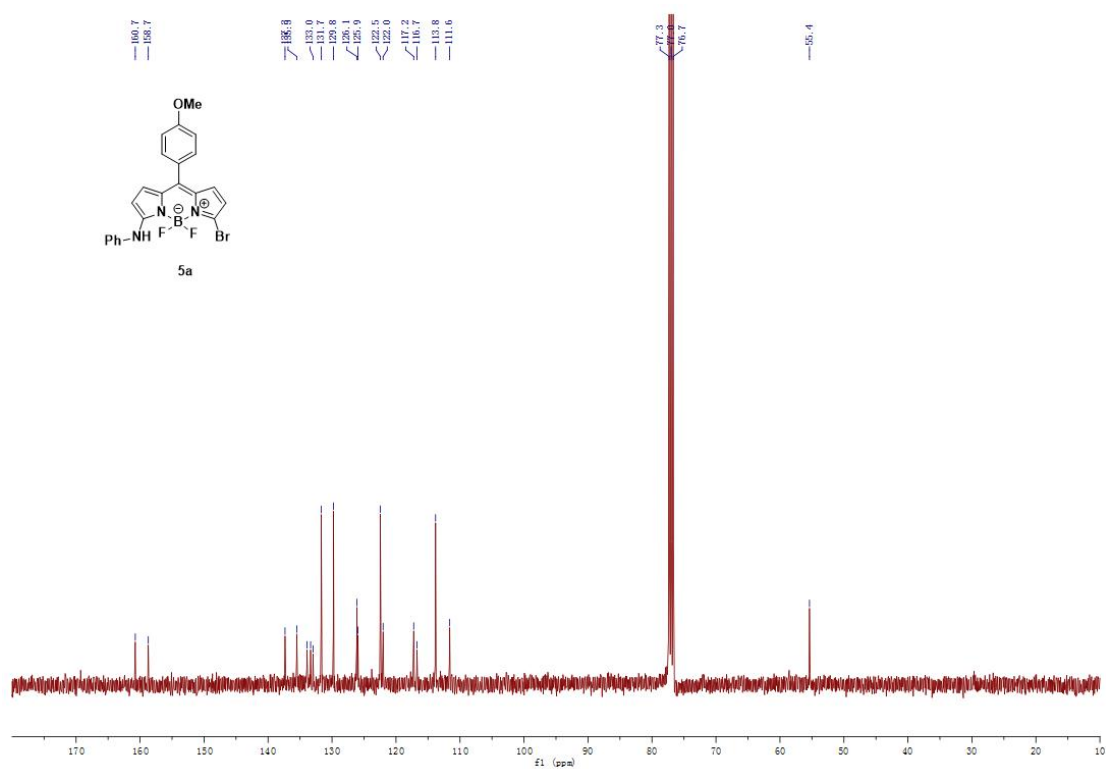

### Compound 5b <sup>1</sup>H NMR

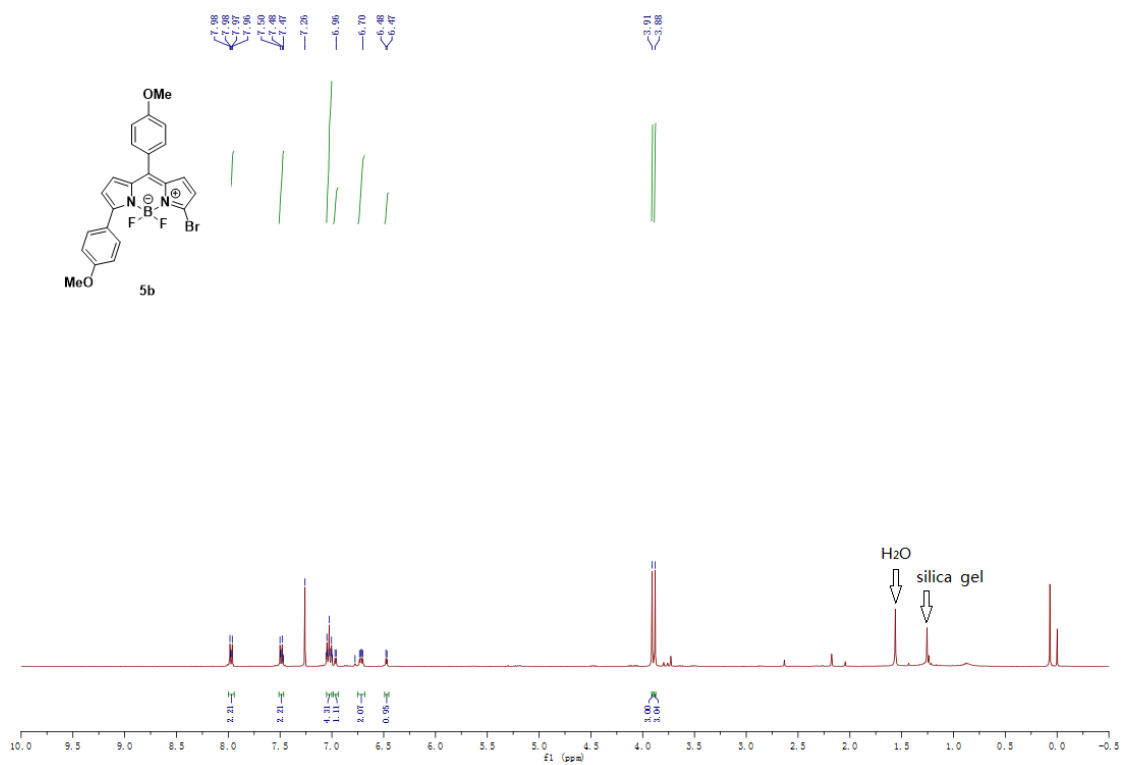

### Compound 5b <sup>13</sup>C NMR

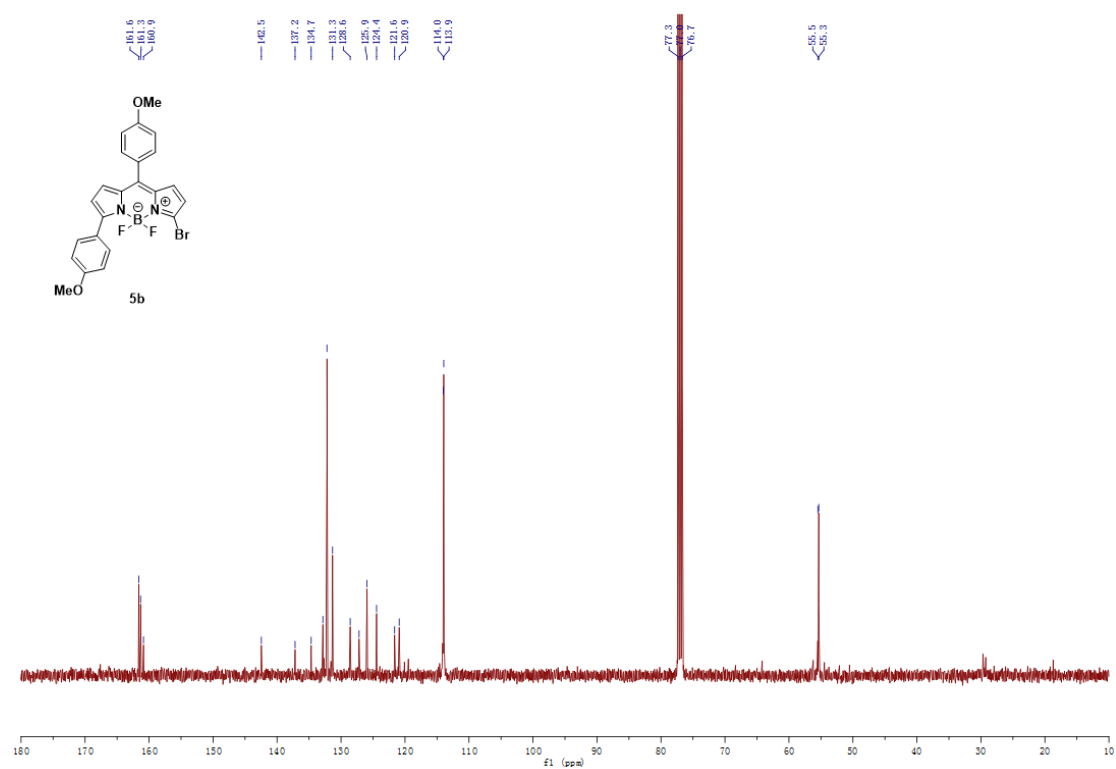



### Compound 5c <sup>1</sup>H NMR

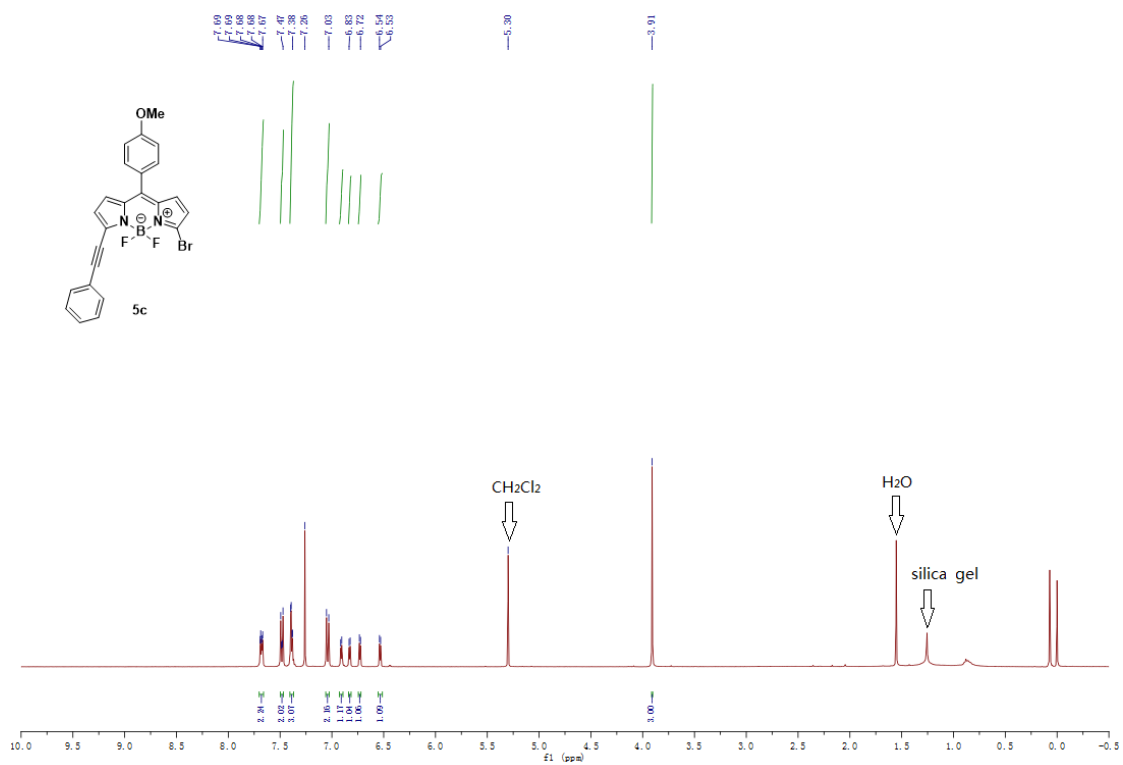

### Compound 5c <sup>13</sup>C NMR

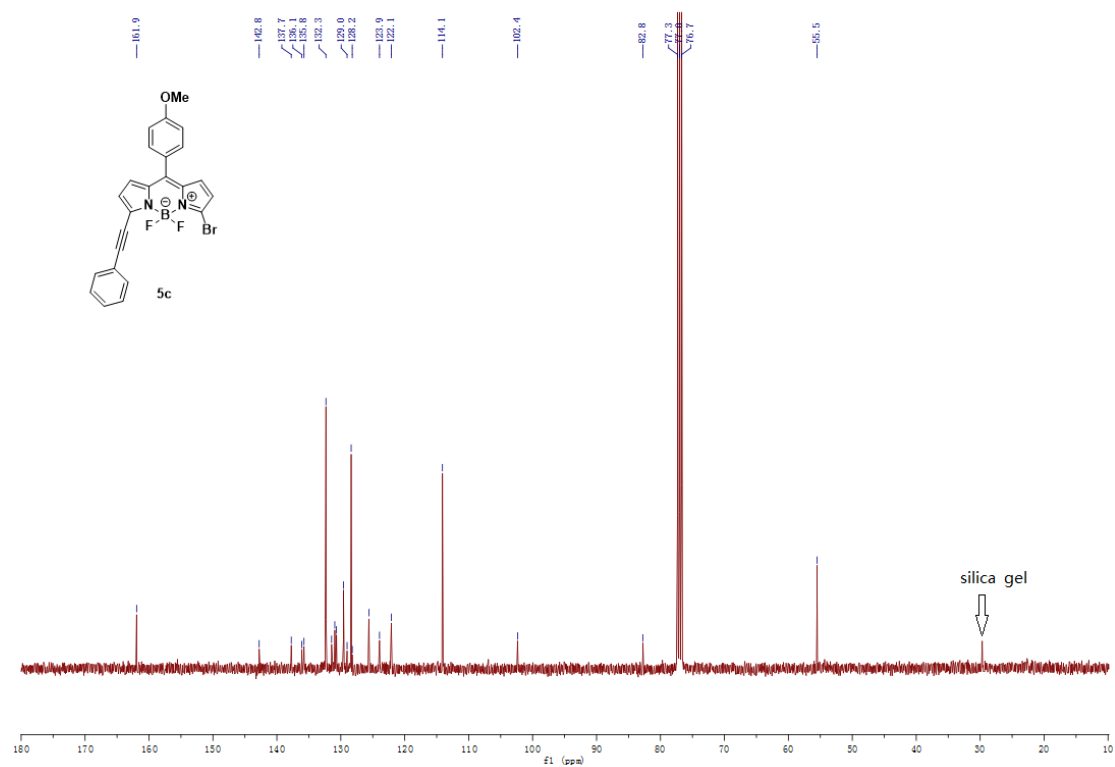

### Compound 5d <sup>1</sup>H NMR

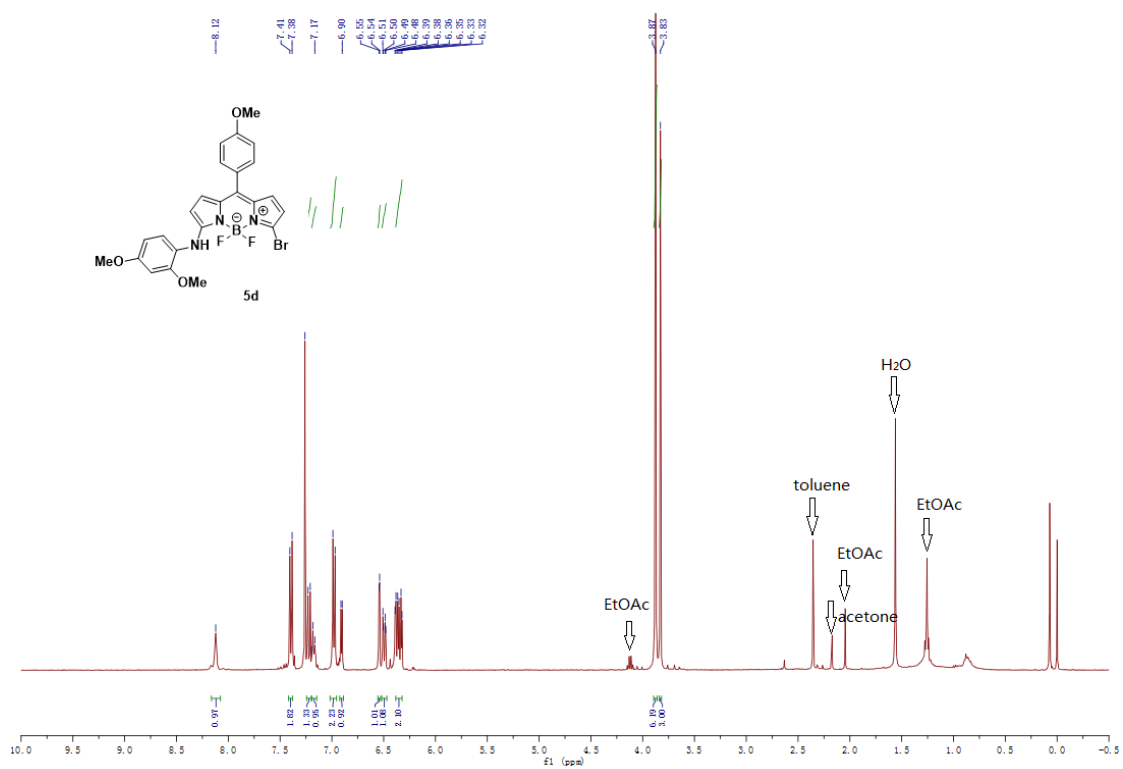

### Compound 5d <sup>13</sup>C NMR

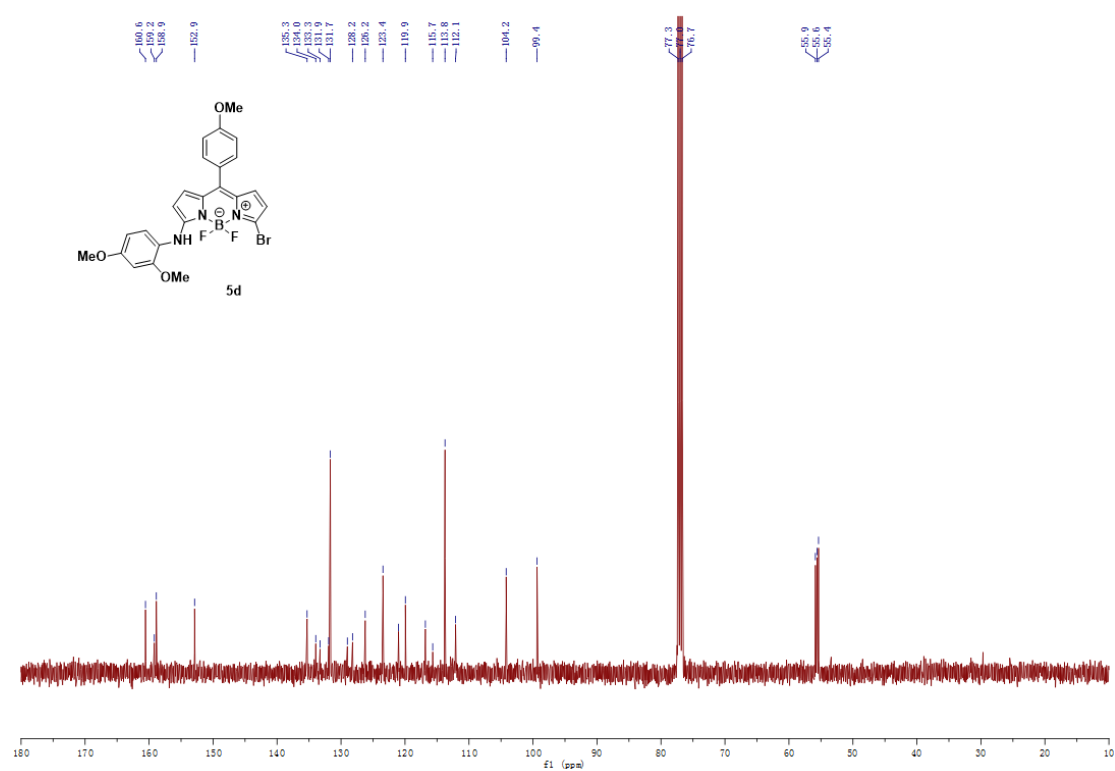

### Compound 5e <sup>1</sup>H NMR

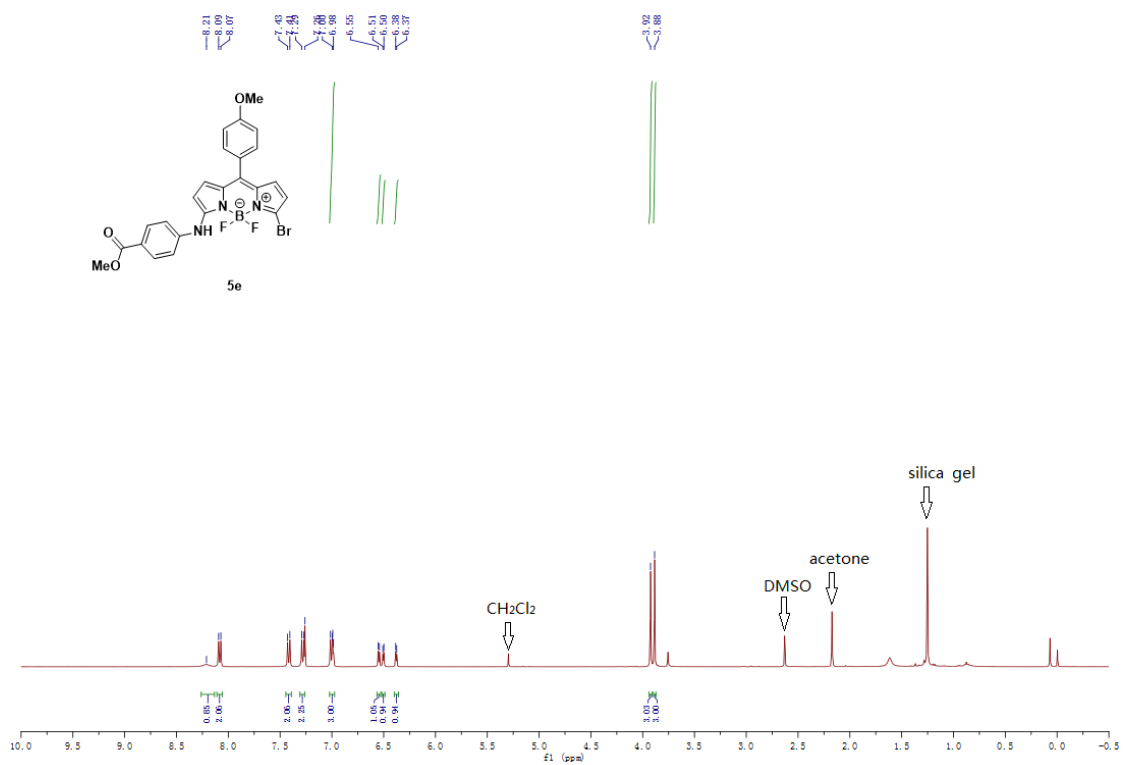

### Compound 5e <sup>13</sup>C NMR

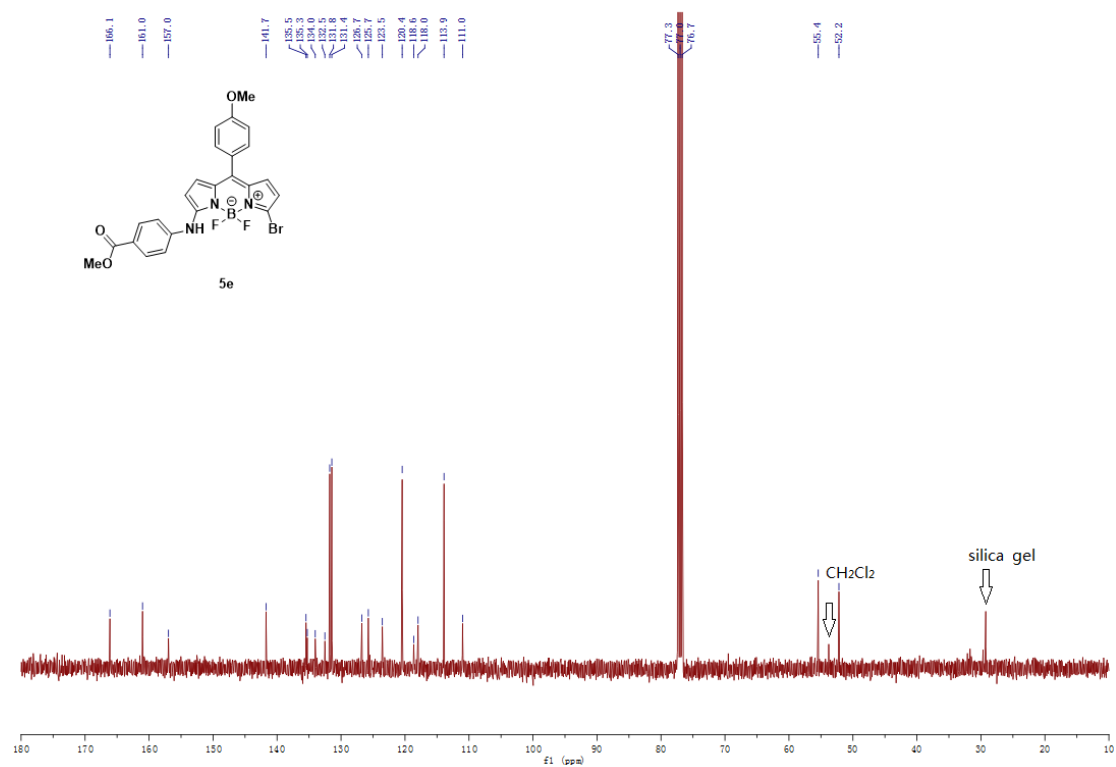



### Compound 5g <sup>1</sup>H NMR

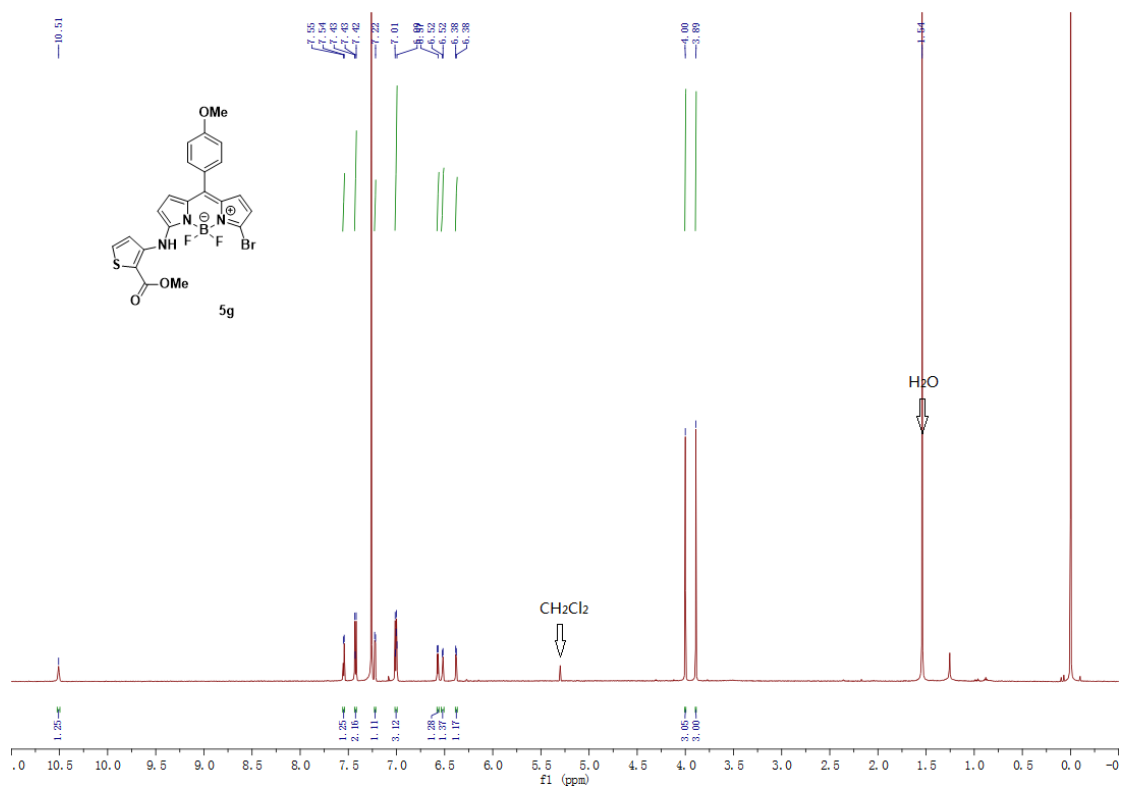

### Compound 5g <sup>13</sup>C NMR

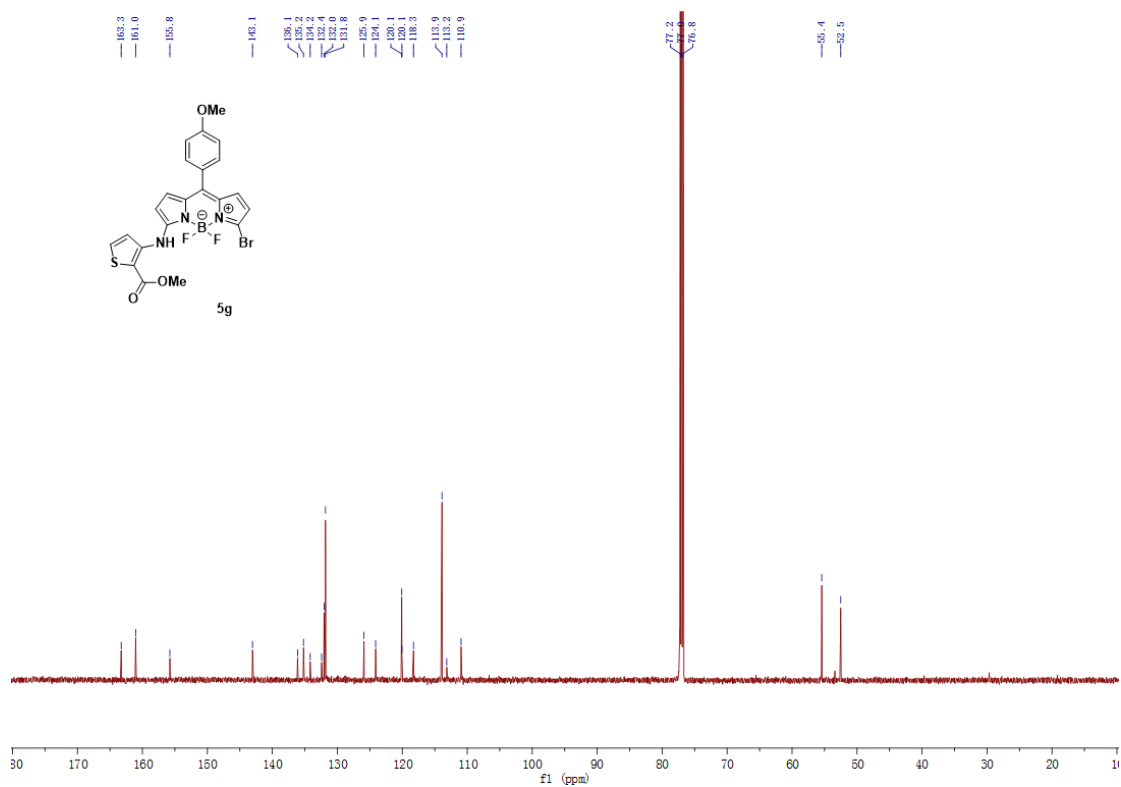

### Compound 5h <sup>1</sup>H NMR

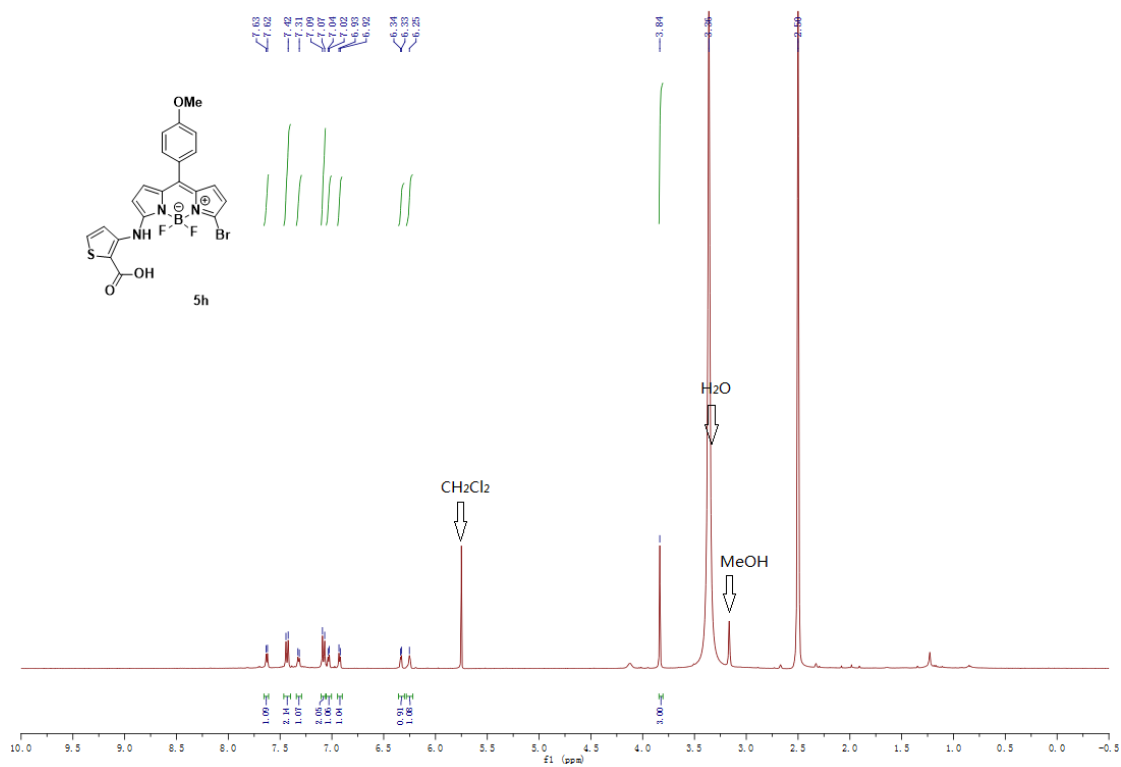

### Compound 5h <sup>13</sup>C NMR

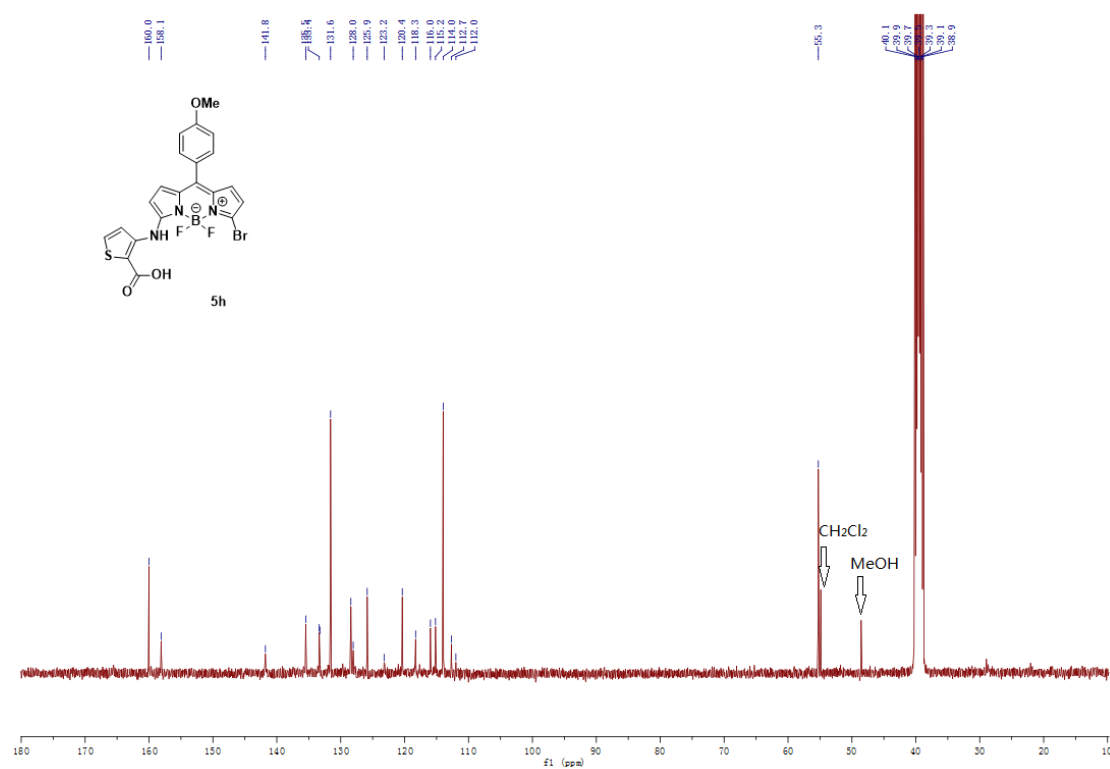

### Compound 5i <sup>1</sup>H NMR

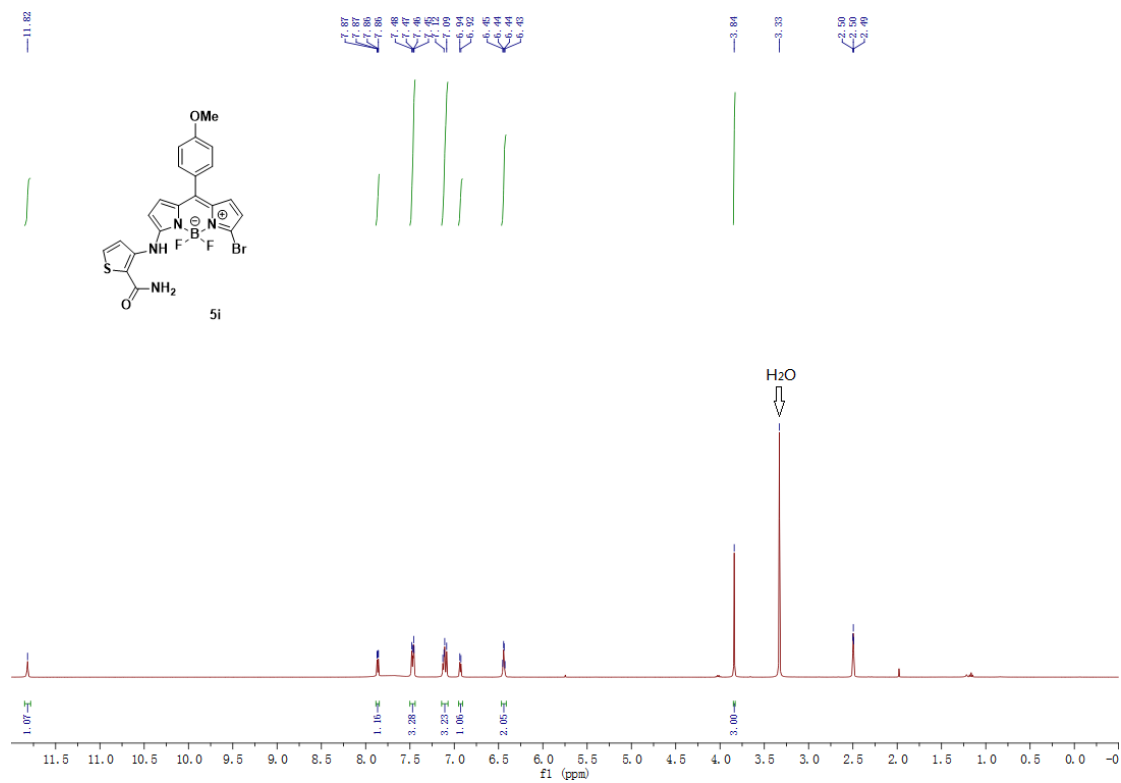

### Compound 5i <sup>13</sup>C NMR

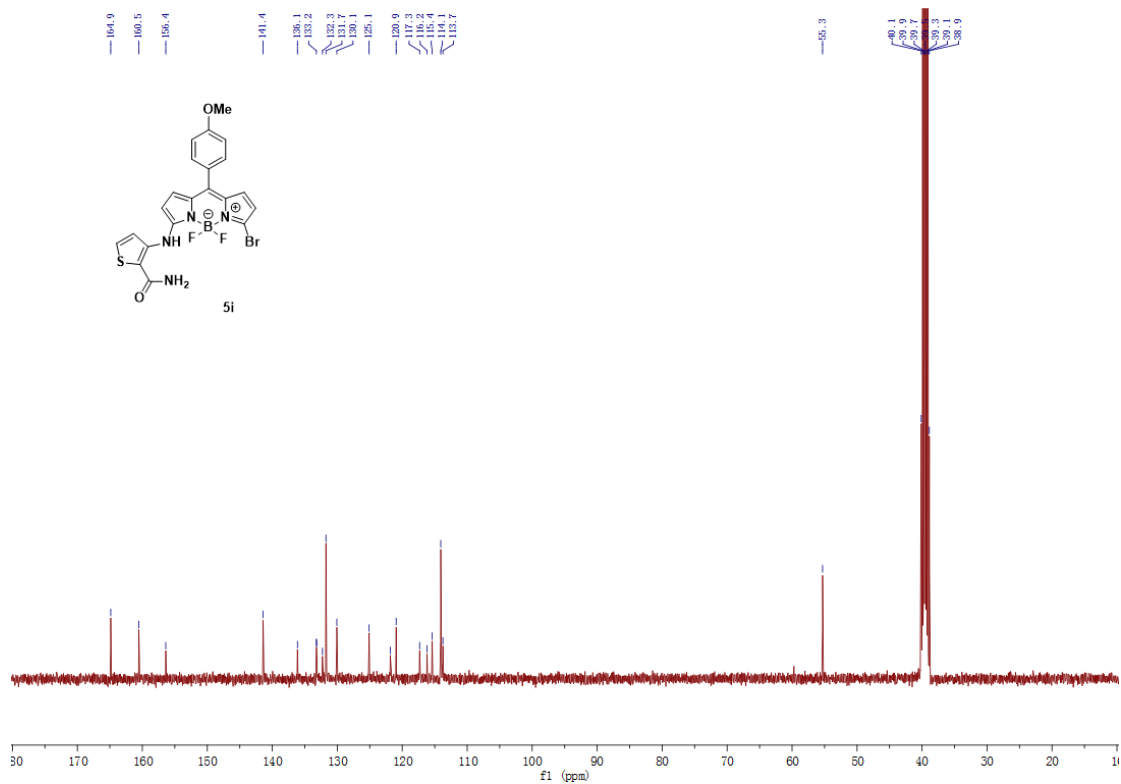

### Compound 6a <sup>1</sup>H NMR

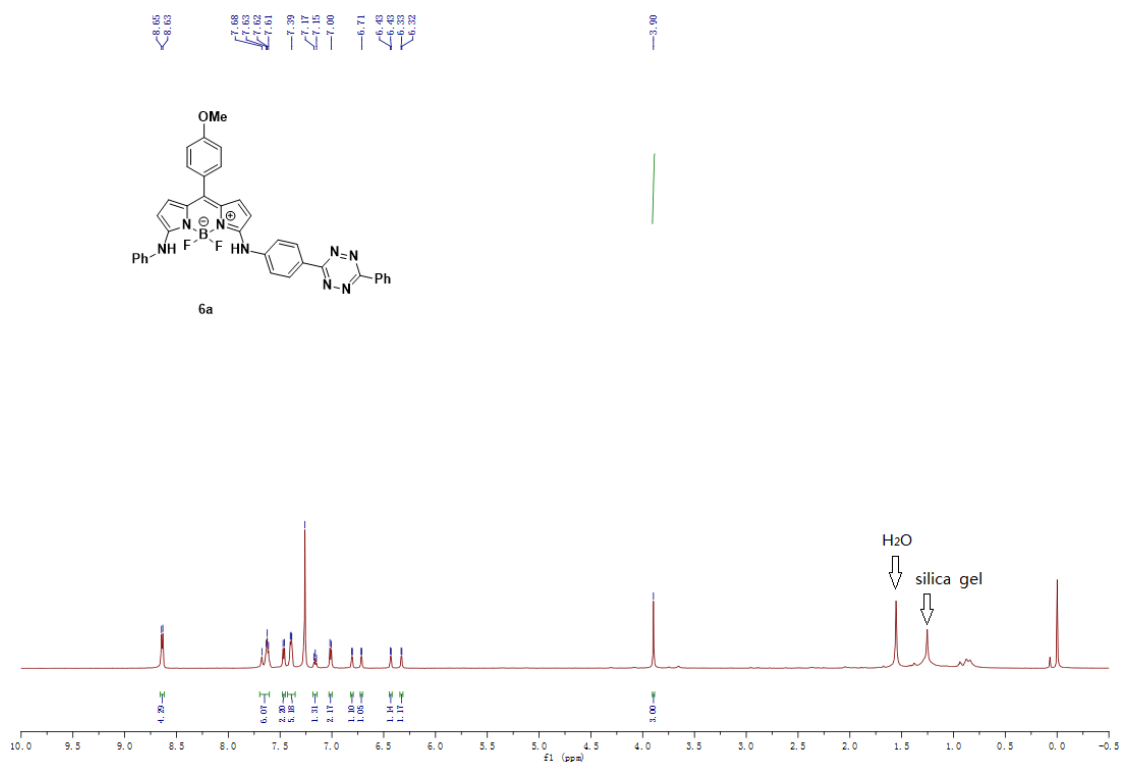

### Compound 6a <sup>13</sup>C NMR

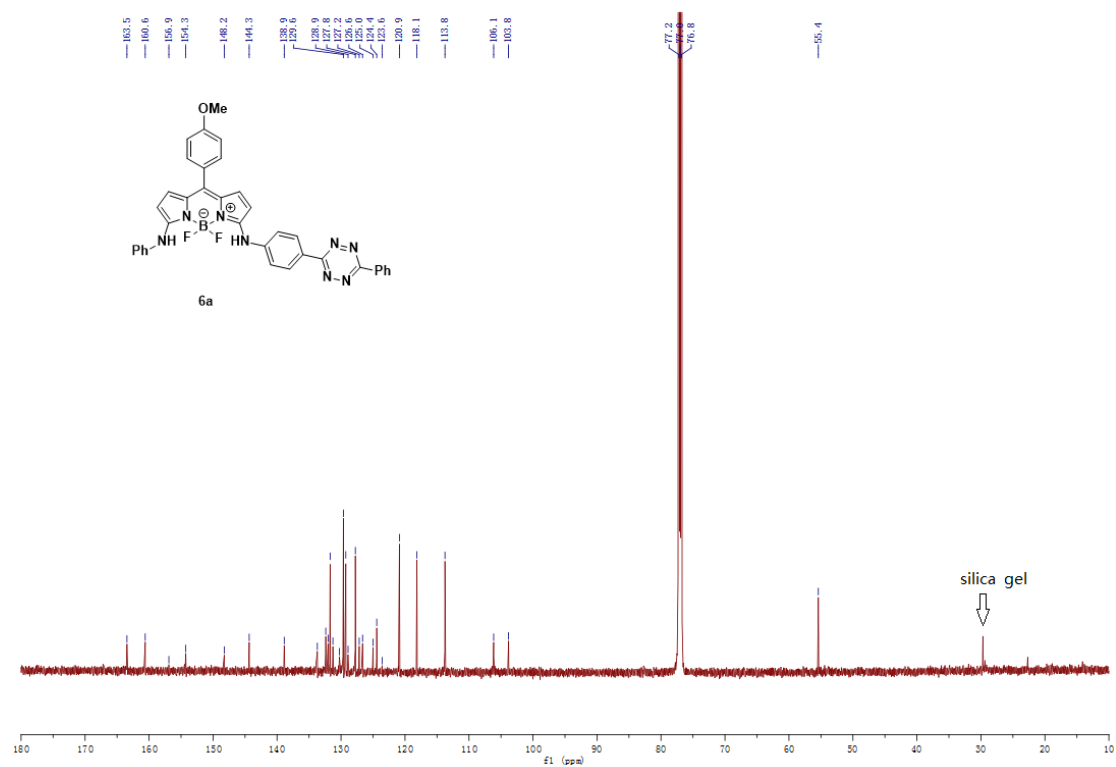



### Compound 6b <sup>1</sup>H NMR

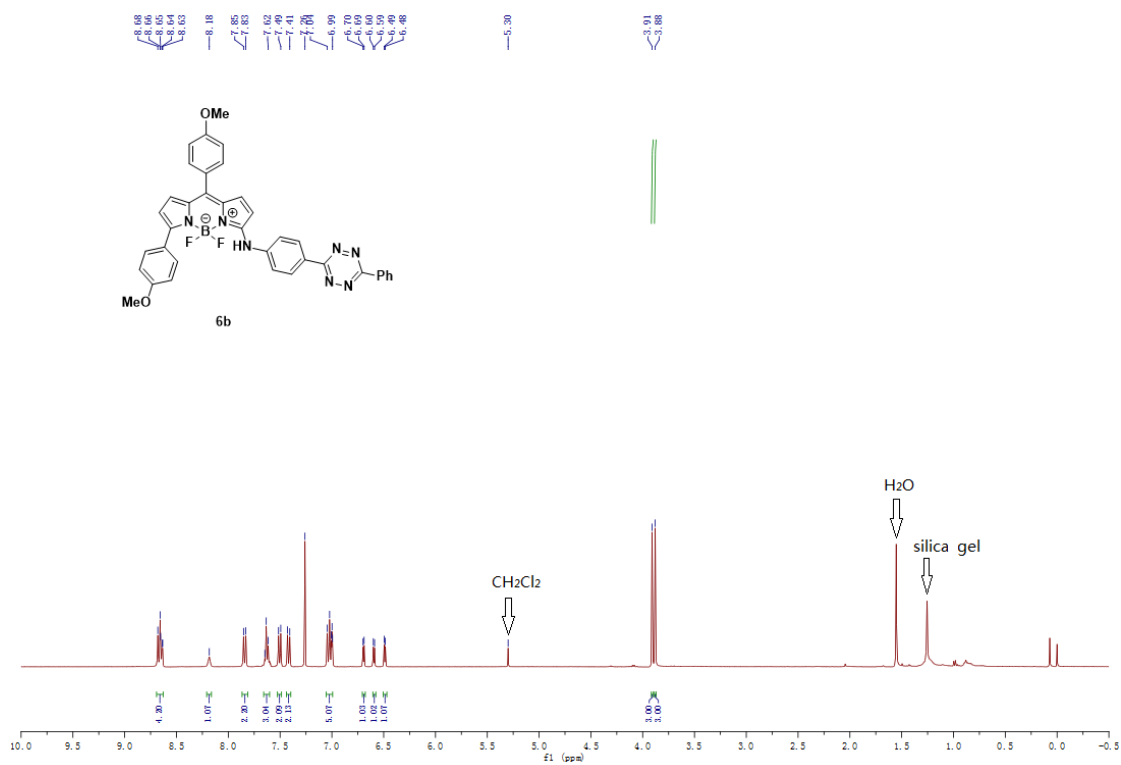

### Compound 6b <sup>13</sup>C NMR

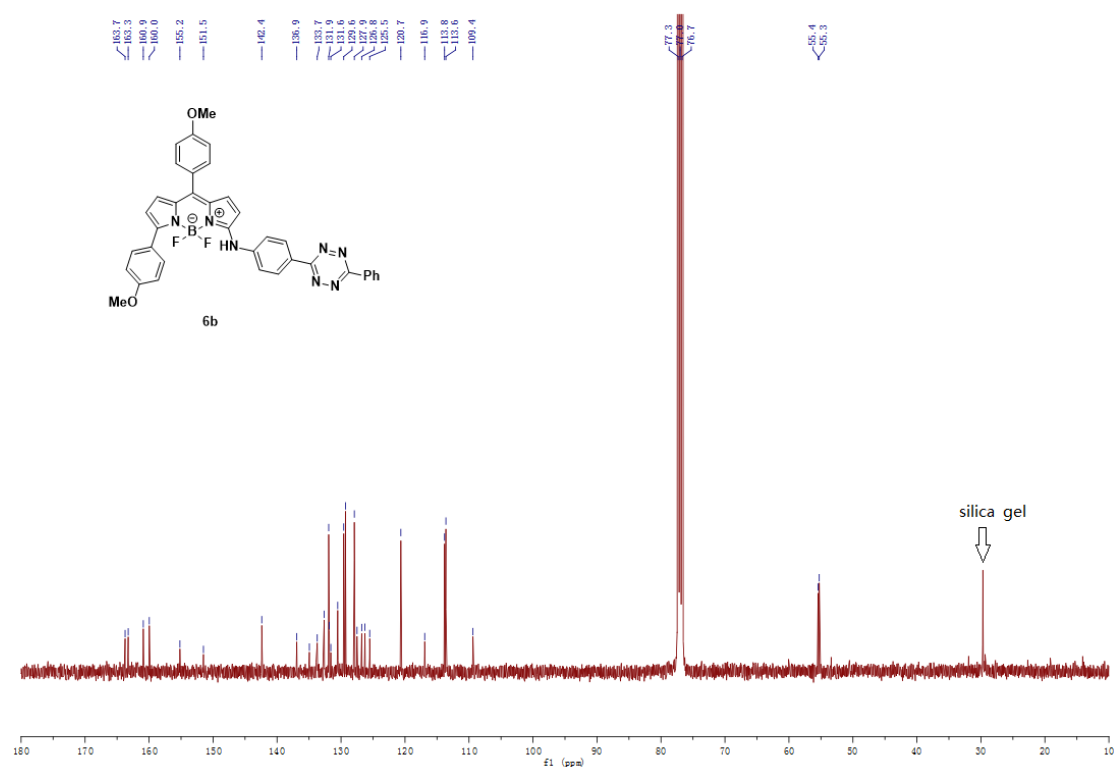

### Compound 6c <sup>1</sup>H NMR

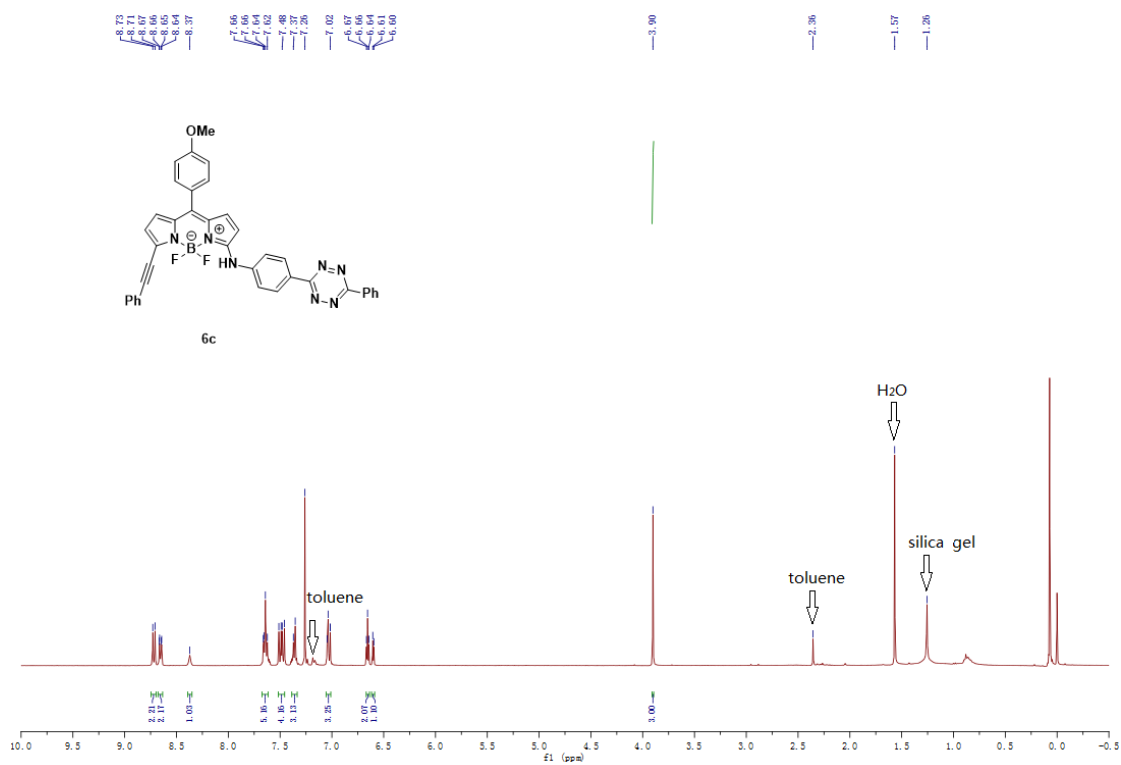

### Compound 6c <sup>13</sup>C NMR

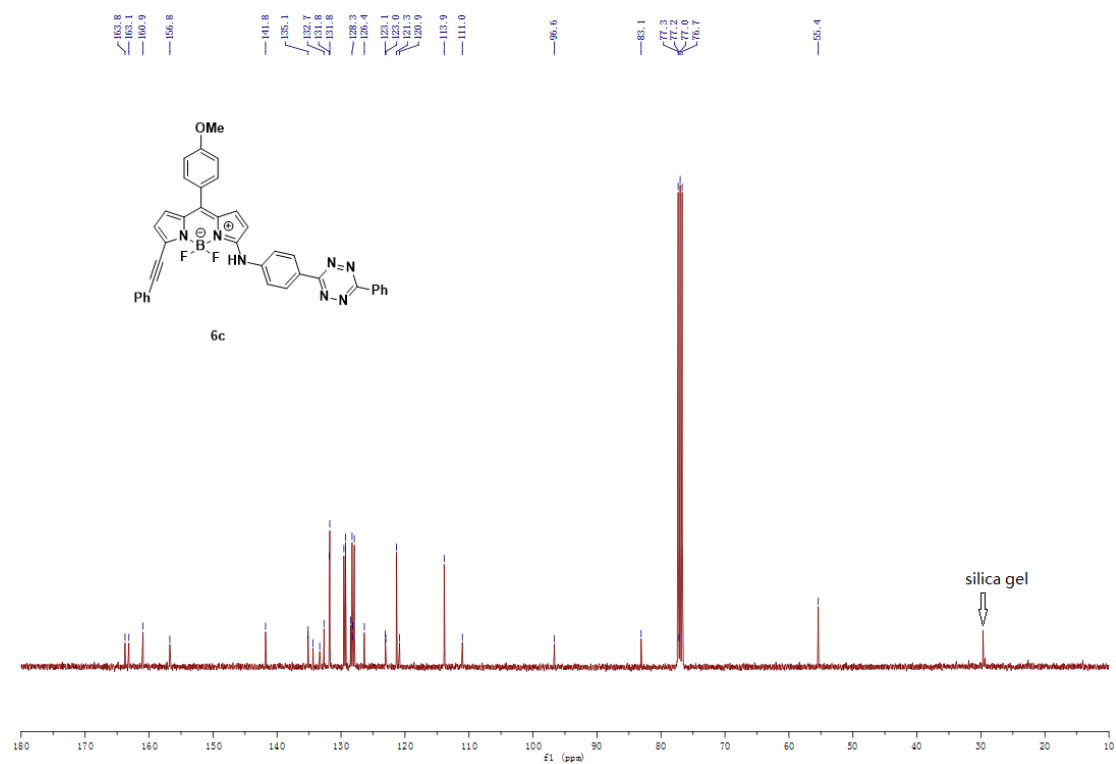

### Compound 6d <sup>1</sup>H NMR

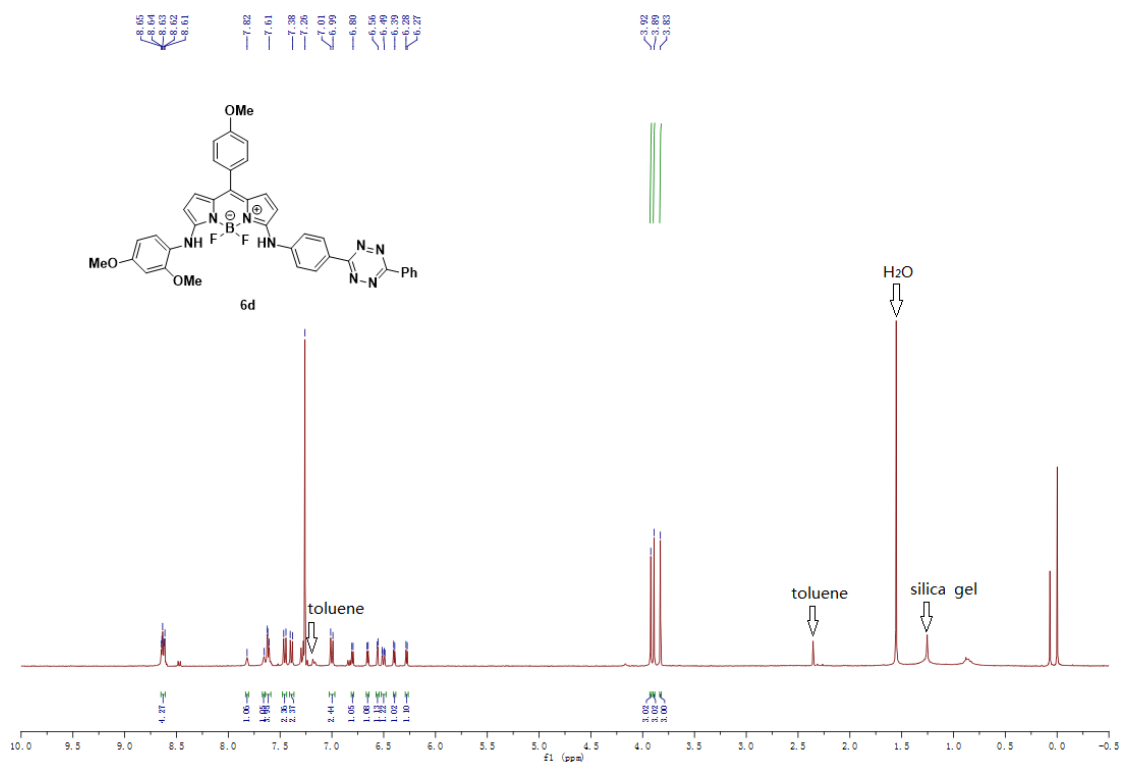

### Compound 6d <sup>13</sup>C NMR

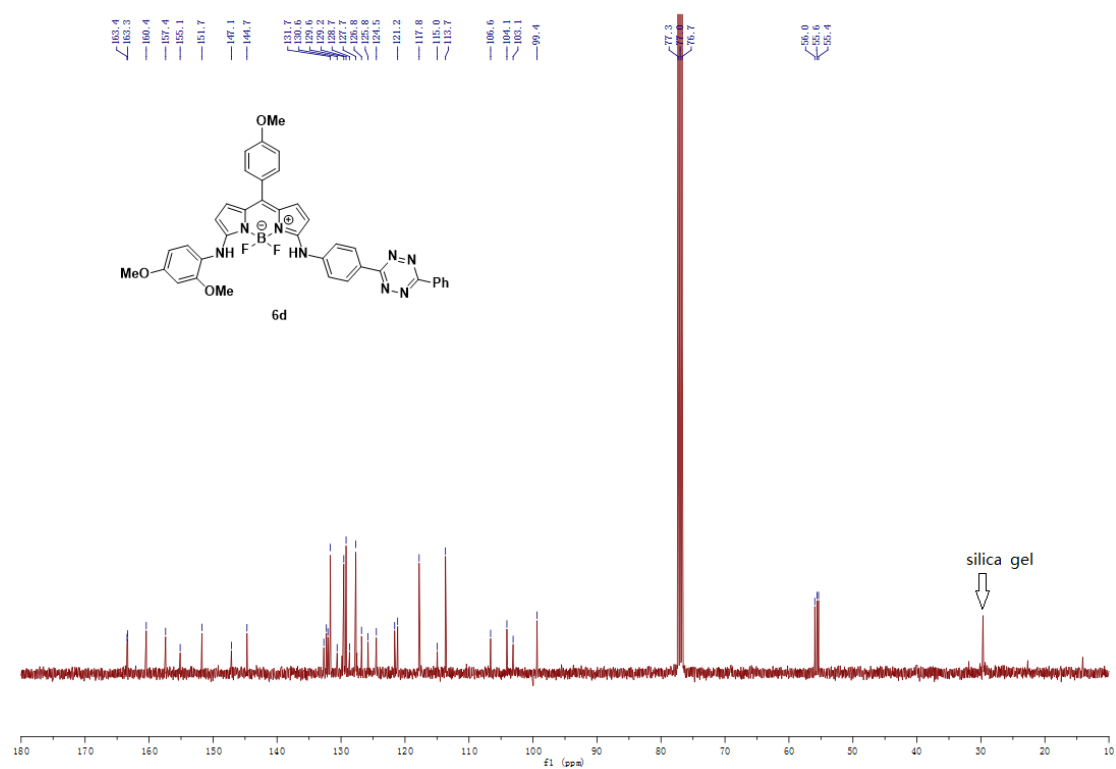

### Compound 6e <sup>1</sup>H NMR

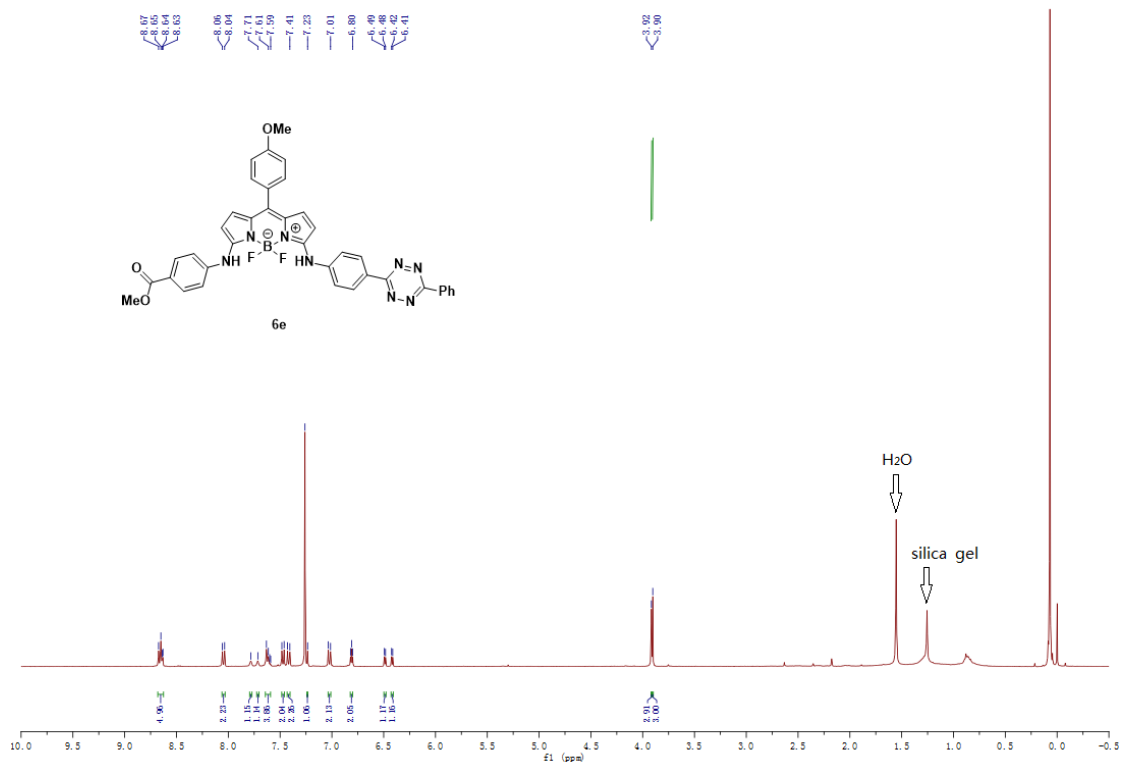

### Compound 6e <sup>13</sup>C NMR

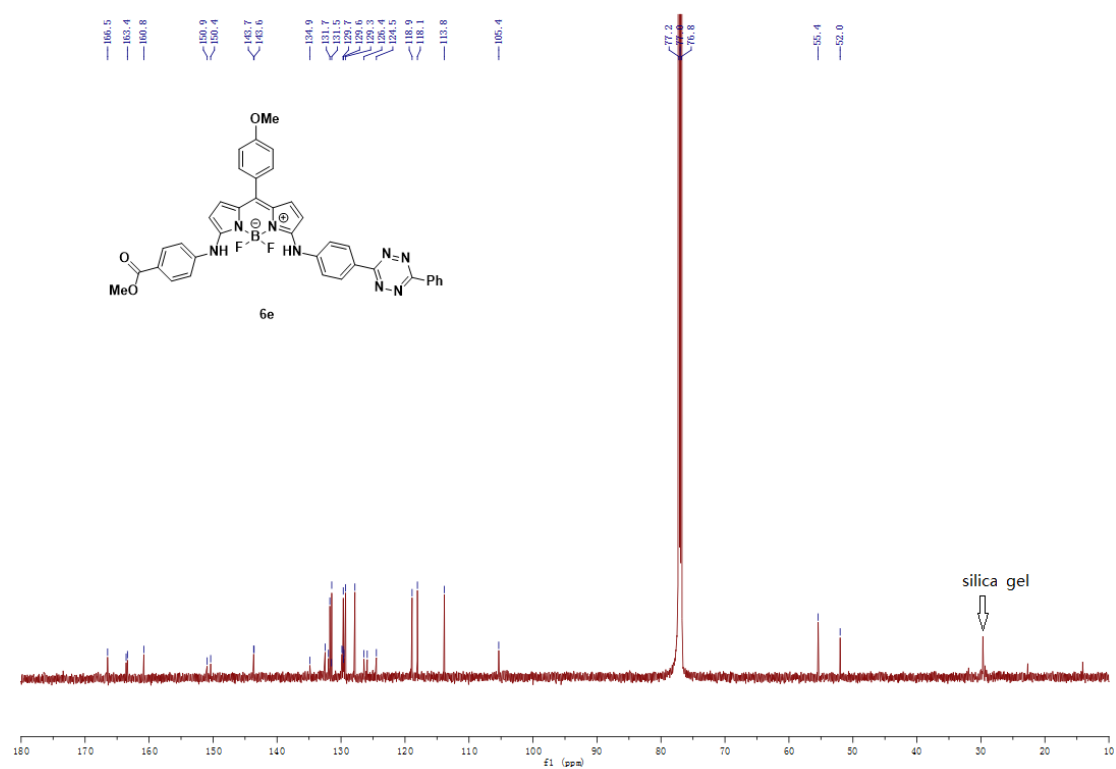

### Compound 6f <sup>1</sup>H NMR

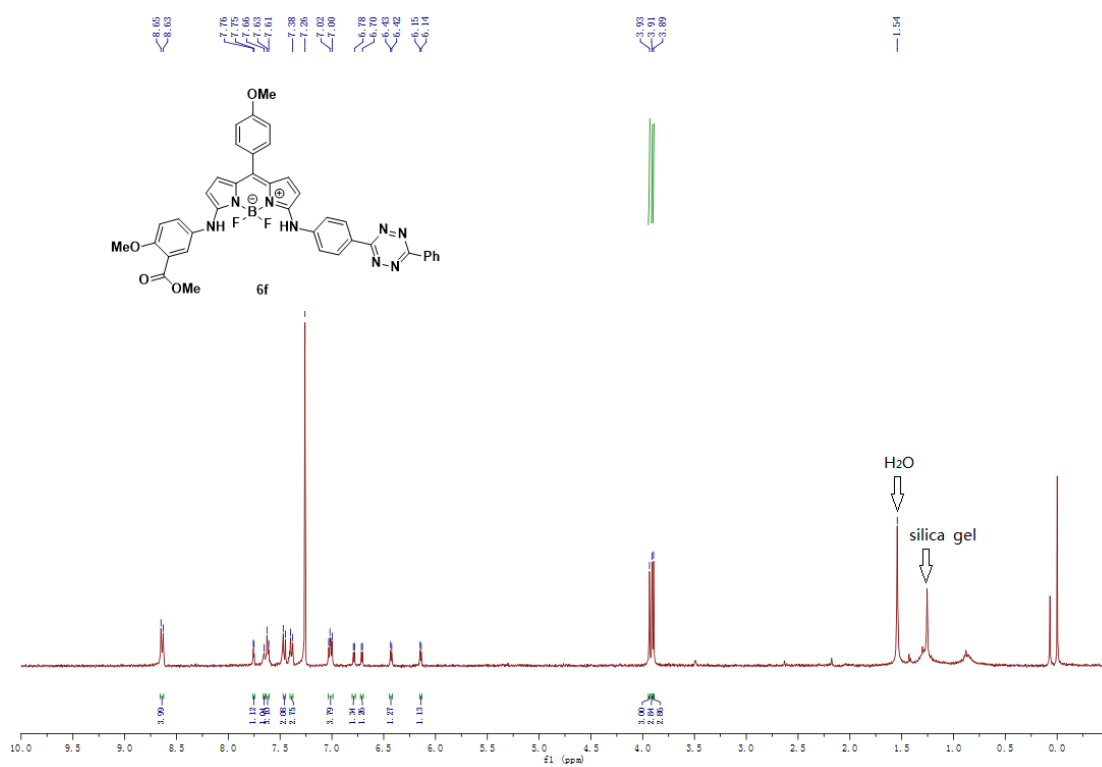

### Compound 6f <sup>13</sup>C NMR

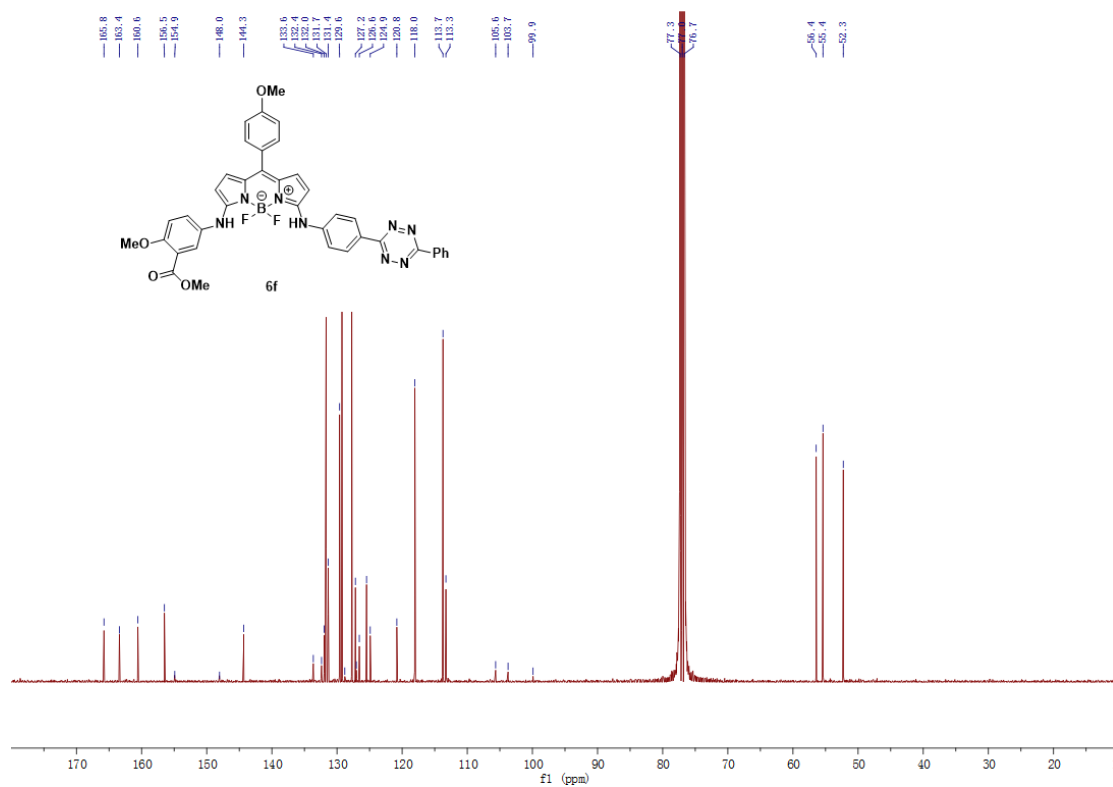

### Compound 6g <sup>1</sup>H NMR

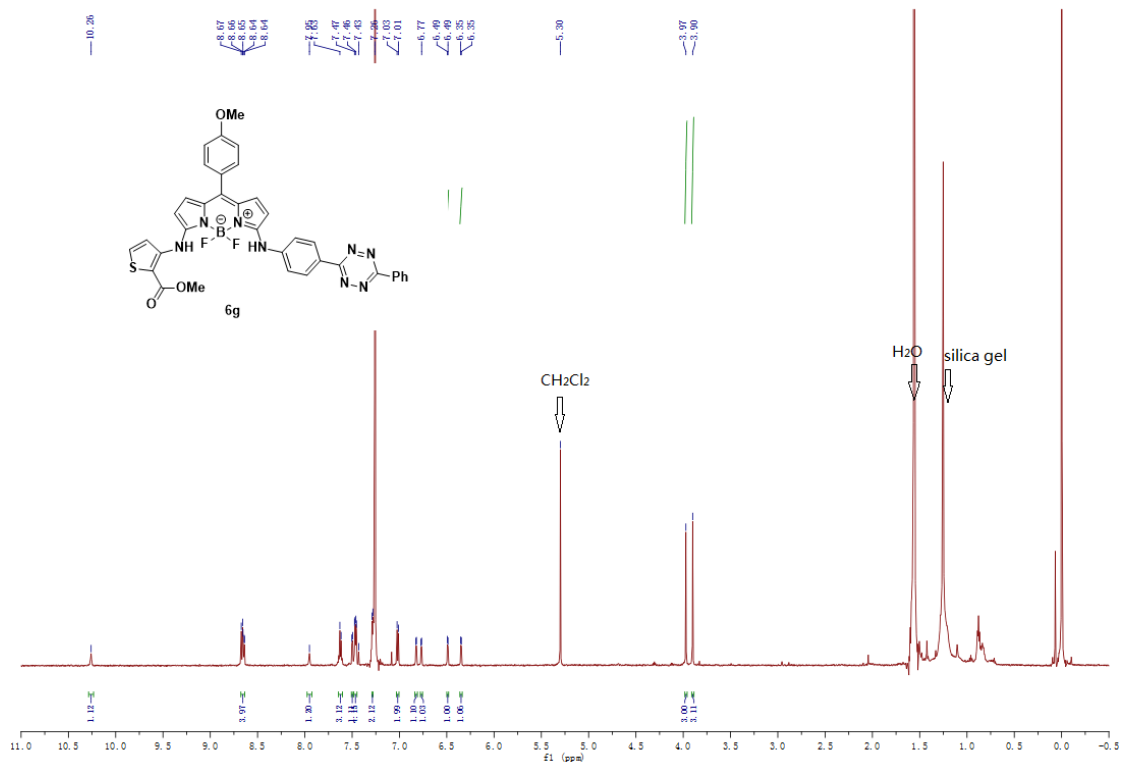

### Compound 6g <sup>13</sup>C NMR

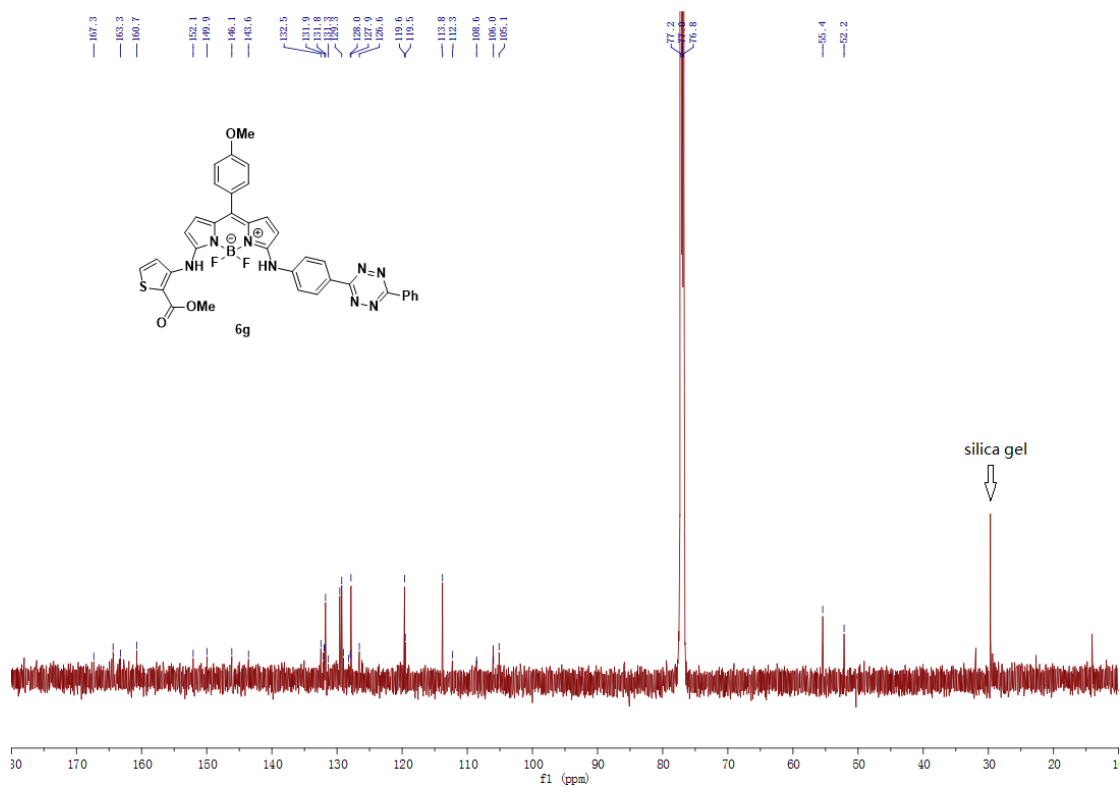



### Compound 6i <sup>1</sup>H NMR

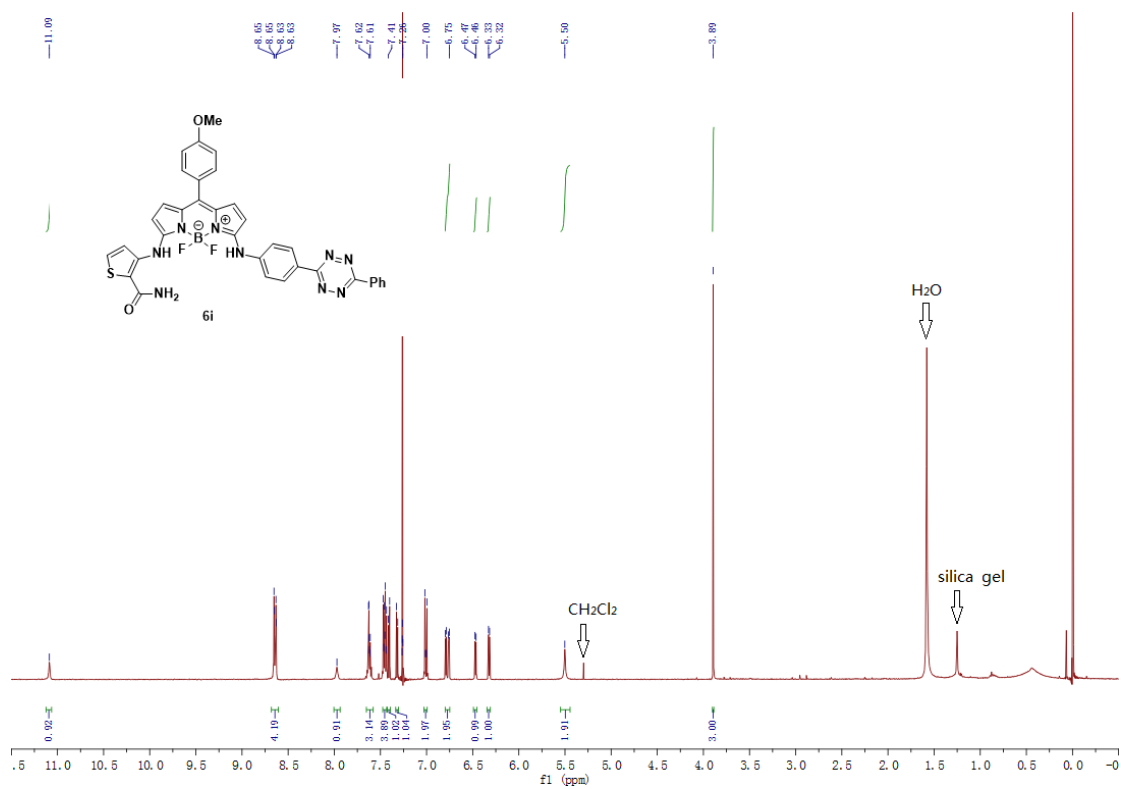

### Compound 6i <sup>13</sup>C NMR

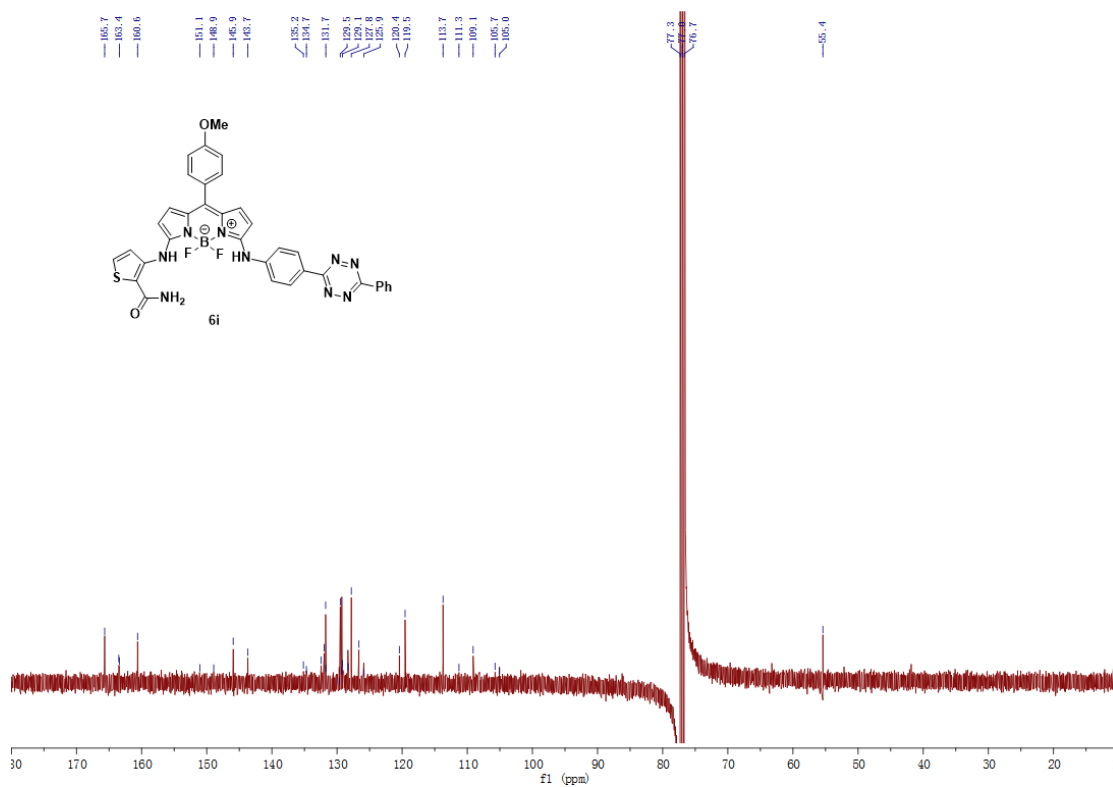



## References

- [1] E. Palao, A. R. Agarrabeitia, Jorge Bañuelos-Prieto, T. A. Lopez, M. J. Ortiz, *Org. Lett.*, 2013, **15**, 4603.
- [2] T. K. Khan, M. R. Rao, M. Ravikanth, *Eur. J. Org. Chem.*, 2010, **12**, 2314.
